1 ***Listeria monocytogenes* GImR is an accessory uridylyltransferase essential for cytosolic**  
2 **survival and virulence**

3

4 Daniel A. Pensinger<sup>1\*</sup>, Kimberly V. Gutierrez<sup>1\*</sup>, Hans B. Smith<sup>1</sup>, William J.B. Vincent<sup>1</sup>, David S.  
5 Stevenson<sup>2</sup>, Katherine A. Black<sup>3</sup>, Krizia M. Perez-Medina<sup>1</sup>, Joseph P. Dillard<sup>1</sup>, Kyu Y. Rhee<sup>3</sup>,  
6 Daniel Amador-Noguez<sup>2</sup>, TuAnh N Huynh<sup>4</sup>, John-Demian Sauer<sup>1#</sup>

7

8 <sup>1</sup>Department of Medical Microbiology and Immunology, <sup>2</sup>Department of Bacteriology and

9 <sup>4</sup>Department of Food Science, University of Wisconsin-Madison, Madison, WI 53706 <sup>3</sup>Weill

10 Cornell Medical College, New York City, NY 10065

11 \*equal contributions

12 #Corresponding Author: Dr. John-Demian Sauer, Department of Medical Microbiology and

13 Immunology, University of Wisconsin-Madison 1550 Linden Dr. Rm 4203, Madison WI, 53706

14 USA. Phone: 608-263-1529. Fax: 608-262-8418. Email: sauer3@wisc.edu

15

16 **Abstract**

17 The cytosol of eukaryotic host cells is an intrinsically hostile environment for bacteria.  
18 Understanding how cytosolic pathogens adapt to and survive in the cytosol is critical to  
19 developing novel therapeutic interventions for these pathogens. The cytosolic pathogen *Listeria*  
20 *monocytogenes* requires *glmR* (previously known as *yvck*), a gene of unknown function, for  
21 resistance to cell wall stress, cytosolic survival, inflammasome avoidance and ultimately  
22 virulence *in vivo*. A genetic suppressor screen revealed that blocking utilization of UDP-GlcNAc  
23 by a non-essential wall teichoic acid decoration pathway restored resistance to cell wall stress  
24 and partially restored virulence of  $\Delta glmR$  mutants. In parallel, metabolomics revealed that  
25  $\Delta glmR$  mutants are impaired in the production of UDP-GlcNAc, an essential peptidoglycan and  
26 wall teichoic acid (WTA) precursor. We next demonstrated that purified GlmR can directly  
27 catalyze the synthesis of UDP-GlcNAc from GlcNAc-1P and UTP, suggesting that it is an  
28 accessory uridylyltransferase. Biochemical analysis of GlmR orthologues suggest that  
29 uridylyltransferase activity is conserved. Finally, mutational analysis resulting in a GlmR mutant  
30 with impaired catalytic activity demonstrated that uridylyltransferase activity was essential to  
31 facilitate cell wall stress responses and virulence *in vivo*. Taken together these studies indicate  
32 that GlmR is an evolutionary conserved accessory uridylyltransferase required for cytosolic  
33 survival and virulence of *L. monocytogenes*.

34

## 35 **Importance**

36 Bacterial pathogens must adapt to their host environment in order to cause disease. The  
37 cytosolic bacterial pathogen *Listeria monocytogenes* requires a highly conserved protein of  
38 unknown function, GImR (previously known as YvckK) to survive in the host cytosol. GImR is  
39 important for resistance to some cell wall stresses and is essential for virulence. The  $\Delta gImR$   
40 mutant is deficient in production of an essential cell wall metabolite, UDP-GlcNAc, and  
41 suppressors which increase metabolite levels also restore virulence. Purified GImR can directly  
42 catalyze the synthesis of UDP-GlcNAc and this enzymatic activity is conserved in pathogens  
43 from Firmicutes and Actinobacteria phyla. These results highlight the importance accessory cell  
44 wall metabolism enzymes in responding to cell wall stress in a variety of bacterial pathogens.

## 45 **Introduction**

46 Bacterial pathogens encounter a variety of stresses throughout the course of infection ranging  
47 from nutritional stresses, redox stresses and cell wall stresses. Specifically, the mammalian  
48 cytosol restricts the survival and replication of bacteria that are not adapted for that niche (1–7).  
49 To protect the cytosol, the host utilizes a variety of known and unknown cell autonomous  
50 defenses (CADs) that directly target bacterial survival (8, 9). Despite this, canonical cytosolic  
51 pathogens such as *Listeria monocytogenes* can replicate efficiently in this environment. These  
52 bacterial pathogens have developed adaptations to survive host imposed stresses in the cytosol  
53 (10), acquire necessary nutrients (11), and divert or subvert innate immune defenses (12, 13).  
54 Although many of the adaptations that allow cytosol adapted pathogens to endure host  
55 defenses and stress in the cytosol remain unknown, recent genetic screens have identified  
56 some bacterial genes that contribute to cytosolic survival, however the molecular function of  
57 many of these genes remains unknown (7, 14, 15).

58 A number of virulence factors essential for cytosolic survival of *L. monocytogenes*, a highly  
59 cytosol adapted pathogen, have recently been identified (4, 14, 16, 17). One such protein, GlmR  
60 (also known as YvcK or CuvA), is a highly conserved protein found in firmicutes and  
61 actinobacteria. GlmR and its homologues are dispensable for growth in nutrient rich media, but  
62 are essential for growth on gluconeogenic carbon sources and in the presence of cell wall stress  
63 (16, 18, 19). Consistent with these functions, *L. monocytogenes* GlmR expression is also  
64 induced in response to cell wall stress (16). Finally, *L. monocytogenes* GlmR is required for  
65 cytosolic survival and replication in host cells (14), and is required for virulence of both *L.*  
66 *monocytogenes* and *Mycobacterium tuberculosis in vivo* (16, 19, 20). In *S. aureus* GlmR is  
67 predicted to be essential, even in rich media in the absence of cell wall stress (21). Despite the  
68 striking phenotypes of  $\Delta$ *glmR* mutants in a variety of organisms, molecular function(s) of the  
69 protein remain largely unknown.

70 How GlmR contributes to cell wall stress responses and virulence remains largely unknown,  
71 however, GlmR was recently described to bind to the essential cell wall precursor UDP-N-  
72 acetyl-glucosamine (UDP-GlcNAc) (22). UDP-GlcNAc is required for the synthesis of  
73 peptidoglycan, wall teichoic acid in Firmicutes, and arabinogalactan in *M. tuberculosis* (23–25). In  
74 *B. subtilis*, GlmR was found to interact with GlmS, one of three highly conserved proteins  
75 necessary for UDP-GlcNAc synthesis (26). To characterize the function of GlmR in *L.*  
76 *monocytogenes* we first utilized a genetic suppressor screen to identify second site mutations  
77 that restored lysozyme resistance of the  $\Delta glmR$  mutant. Two independent suppressor mutants A  
78 increased pools of UDP-GlcNAc ultimately restoring cell wall stress responses and virulence of  
79  $\Delta glmR$  mutants. In parallel, untargeted metabolomics revealed that  $\Delta glmR$  mutants are deficient  
80 in UDP-GlcNAc. We were unable to detect interactions between *L. monocytogenes* GlmR and  
81 its cognate GlmS as previously reported in *B. subtilis* and instead found that purified GlmR, and  
82 its orthologues, demonstrate uridyltransferase activity that can catalyze the synthesis UDP-  
83 GlcNAc from UTP and GlcNAc-1P. Finally, mutational analysis demonstrated that GlmR  
84 uridyltransferase activity is necessary to promote cell wall stress responses and virulence *in*  
85 *vivo*. Together our data suggests that GlmR is an accessory uridyltransferase that is  
86 upregulated to deal with cell wall stress such as that encountered by *L. monocytogenes* during  
87 cytosolic replication.

88

## 89 **Results**

### 90 **Inhibition of non-essential decoration of wall teichoic acid with GlcNAc rescues cell wall** 91 **stress defects of the $\Delta glmR$ mutant**

92 *L. monocytogenes* GlmR is essential for cytosolic survival and virulence, is upregulated in the  
93 context of lysozyme stress and is necessary for resistance to lysozyme (16). To understand how

94 GlmR contributes to cell wall stress responses and virulence we performed a lysozyme  
95 resistance suppressor selection using a Himar1 mariner-based transposon mutant library in a  
96  $\Delta glmR$  mutant background. Twenty unique transposon insertions across fifteen unique genes  
97 suppressed the  $\Delta glmR$  mutant's lysozyme sensitivity (Table 1). The suppressors represent a  
98 diverse set of cellular processes that likely contribute to lysozyme resistance in a variety of ways  
99 including mechanisms that are both generic and GlmR specific. Mutations which generically  
100 upregulate stress response pathways may not be useful for understanding GlmR function.  
101 Therefore, to prioritize cell wall stress suppressor mutants most relevant to the virulence defect  
102 of the  $\Delta glmR$  mutant, we tested all the lysozyme suppressor mutants in a plaque assay. The  
103 plaquing assay represents the most complete *ex vivo* assay for virulence of *L. monocytogenes*  
104 requiring cellular invasion, cytosolic survival, intracellular replication, and cell to cell spread. In  
105 addition to being sensitive to cell wall stress *in vitro*,  $\Delta glmR$  mutants are unable to form wild type  
106 sized plaques in fibroblast monolayers (Fig 1A,B). Only second site mutations in *yfhO*, *gtcA*, and  
107 *corA* statistically significantly rescued the  $\Delta glmR$  plaquing defect (Fig. 1B), while second site  
108 mutations in *relA*, *pbpA* and *oppA* further inhibited plaquing efficiency of  $\Delta glmR$  mutants. The  
109 *yfhO::Tn* and *gtcA::Tn* displayed the most robust suppressor phenotype so we chose to focus  
110 on these mutants for follow up studies. Both mutants suppress lysozyme sensitivity, consistent  
111 with their identification through the lysozyme suppressor screen (Fig. 1C). In *L. monocytogenes*  
112 1/2a strains, both YfhO and GtcA are required for modification of the WTA repeating ribitol  
113 subunits with GlcNAc derived from UDP-GlcNAc (15, 27, 28). We confirmed that the  $\Delta glmR$   
114 *gtcA::Tn* double mutant is defective for GlcNAc WTA decoration based on loss of wheat germ  
115 agglutinin staining (Fig. S1). Finally, disruption of *gtcA* or *yfhO* in a  $\Delta glmR$  mutant partially  
116 restores virulence in a murine model of disseminated Listeriosis (Fig. 1D). Taken together,  
117 these data suggest that elimination of non-essential decoration of WTA with GlcNAc increases  
118 available pools UDP-GlcNAc which can rescue  $\Delta glmR$  mutant cell wall stress sensitivity and  
119 virulence *ex vivo* and *in vivo*.

## 120 ***ΔglmR* mutants have depleted pools of muropeptide precursors**

121 Based on the observation that loss of GlcNAc decoration of the WTA restored lysozyme  
122 resistance and partial virulence to *ΔglmR* deficient mutants, we hypothesized that *ΔglmR*  
123 mutants may have metabolic defects leading to decreased UDP-GlcNAc synthesis. To test this  
124 hypothesis, we utilized untargeted metabolomics to identify differentially abundant metabolites  
125 in *ΔglmR* mutants relative to wild type *L. monocytogenes*. After growth in modified *Listeria*  
126 synthetic media (LSM) and metabolite extraction, we observed 1073 putative Kyoto  
127 Encyclopedia of Genes and Genomes (KEGG) identifiable metabolites including 37 metabolites  
128 with >2-fold differences between wild-type and the *ΔglmR* mutant across three biological  
129 replicates (Fig. 2A, Table S1). The relatively small number of differential metabolites suggests  
130 that GlmR does not have a global regulatory function, at least under laboratory growth  
131 conditions. Consistent with our hypothesis, the highest abundance metabolite with >2-fold  
132 differential abundance was the essential cell wall precursor metabolite UDP-GlcNAc. Compared  
133 to wild type *L. monocytogenes*, UDP-GlcNAc levels are reduced by 73% in the *ΔglmR* mutant  
134 (Fig. 2B), consistent with the hypothesis from the suppressor screen that UDP-GlcNAc  
135 metabolism is disrupted in the *ΔglmR* mutant. UDP-N-acetyl-muramic acid (UDP-MurNAc),  
136 another peptidoglycan precursor downstream of UDP-GlcNAc (Fig. 2C) was similarly decreased  
137 in the *ΔglmR* mutant (~50% of wild type). Upstream of UDP-GlcNAc, N-acetyl-glucosamine-1  
138 phosphate (GlcNAc-1P) levels were also significantly reduced in the *ΔglmR* mutant, however  
139 UTP levels were unchanged (Fig. 2B). We were unable to observe the GlmSMU pathway  
140 intermediates glucosamine- 1 phosphate (GlcN-1P) and glucosamine- 6 phosphate (GlcN-6P).  
141 Finally, levels of the glycolytic intermediates fructose-6-phosphate (F6P) and fructose-1,6-  
142 biphosphate (FBP) are unchanged in the *ΔglmR* mutant, suggesting that deficits in  
143 muropeptide precursors are due specifically to alterations in the GlmSMU pathway and not in a  
144 more central metabolic pathway. Levels of UDP-Glucose, a GlmM dependent metabolite, were

145 unchanged between wild-type and the  $\Delta glmR$  mutant indicating that GlmM's activity is unlikely  
146 to be altered in a  $\Delta glmR$  mutant. Consistent with the model that blocking a non-essential UDP-  
147 GlcNAc utilizing pathway increases available UDP-GlcNAc for essential PG or WTA synthesis,  
148 metabolomic analysis of both the  $\Delta glmR gtcA::Tn$  and the  $\Delta glmR yfhO::Tn$  suppressor mutants  
149 demonstrated significant rescue of UDP-GlcNAc levels, though not all the way back to wild-type  
150 levels (Fig. 2D). Taken together, these data demonstrate that UDP-GlcNAc metabolism is  
151 disrupted in  $\Delta glmR$  mutants and suggests that restoration of UDP-GlcNAc pools restores cell  
152 wall stress responses and virulence *in vivo*.

### 153 **GlmR is an accessory uridylyltransferase**

154 Two recent studies in *B. subtilis* suggested that GlmR's function was to enhance the activity of  
155 GlmS through direct GlmR-GlmS interactions. Bacterial two-hybrid assays demonstrated a  
156 direct interaction between *B. subtilis* GlmR and GlmS (26) and a subsequent study  
157 demonstrated that this interaction modulates GlmS activity (29). To determine if GlmR-GlmS  
158 interactions were conserved in *L. monocytogenes*, we expressed both *B. subtilis* and *L.*  
159 *monocytogenes* GlmS and GlmR constructs in the bacterial two hybrid system. Each protein  
160 was expressed independently as both N- and C-terminal fusions to both T18 and T25. Four  
161 replicates of the blue-white assay were performed due to variability in the system from a known  
162 thresholding effect (30) and quantitative  $\beta$ -galactosidase assays were performed in triplicate. As  
163 predicted based on their crystal structures, GlmS (31) and GlmR (PDB 2Q7X and 1HZB) from  
164 both *B. subtilis* and *L. monocytogenes* homodimerized, demonstrating that the constructs were  
165 expressed and functional (Fig S2A,B). Positive, but inconsistent interactions between *B. subtilis*  
166 GlmR and GlmS were observed as previously reported for one set of *B. subtilis* fusion proteins  
167 (Fig S3A,B) (26), however no combination of *L. monocytogenes* GlmR and GlmS produced an  
168 interaction except those for which there was also activity observed in the empty vector controls  
169 (Fig S4A,B). Taken together these data suggest that GlmR regulation of GlmS through protein-



170 protein interactions may not be evolutionarily conserved among GlmR homologues and that  
171 GlmR must function to regulate UDP-GlcNAc levels by a novel mechanism in *L.*  
172 *monocytogenes*.

173 A distant homologue of GlmR is CofD, a 2-phospho-lactate transferase involved in the synthesis  
174 of Coenzyme F420 in actinobacteria (32). This homology to a catalytic protein suggests that  
175 perhaps GlmR has direct enzymatic activity. We hypothesized that, analogous to the accessory  
176 UDP-N-acetylglucosamine enolpyruvyl transferase function of MurZ (33), GlmR could be an  
177 accessory enzyme functioning to increase pools of UDP-GlcNAc in the context of cell wall  
178 stress. To test this hypothesis, we cloned and purified GlmR from *L. monocytogenes* and  
179 assessed its potential enzymatic activity in the last two steps of the GlmSMU normally catalyzed  
180 by GlmU to produce UDP-GlcNAc. Using mass spectrometry to assess the results of each  
181 reaction, we found that GlmR catalyzed the synthesis of UDP-GlcNAc from GlcNAc-1P and UTP  
182 (Fig 3A,B), similar to both commercially purchased *Escherichia coli* GlmU as well as *L.*  
183 *monocytogenes* GlmU that we expressed and purified (Fig. 3A,B). Importantly, no UDP-GlcNAc  
184 was detectable with substrates UTP and GlcNAc-1P alone indicating that catalysis required  
185 either the GlmU or GlmR protein (Fig. 3B). Additionally, purified GlmR demonstrated no  
186 acetyltransferase activity, demonstrating that the activity observed was not an artifact of  
187 accidental co-purification of GlmU (Fig. S5A). Finally, the absence of UDP-GlcNAc in a GlmR  
188 reaction mixture lacking GlcNAc-1P and UTP as substrates or after the protein was heated  
189 excludes the possibility of UDP-GlcNAc being a co-purified artifact with GlmR (Fig. 3B). Taken  
190 together, these data suggest that GlmR can act as a uridylyltransferase enzyme to facilitate  
191 increased production of UDP-GlcNAc in response to cell wall stress.

192 **GlmR uridylyltransferase activity is conserved**

193 GlmR is the second gene of a highly conserved operon of three genes found in firmicutes and  
194 actinobacteria. In *S. aureus* the GlmR homologue YvcK is predicted to be essential (21) while in  
195 *M. tuberculosis* the GlmR homologue CuvA is essential for virulence (19, 20). The *S. aureus*  
196 and *M. tuberculosis* homologues from these species exhibit high identity to *L. monocytogenes*  
197 GlmR, with 46% identity, 69% similarity and 34% identity, 57% similarity, respectively, and are  
198 best conserved near the putative N-terminal active site (Fig. 4A). To determine whether GlmR  
199 enzymatic function is broadly conserved, we first purified GlmR from *S. aureus*, *M. tuberculosis*  
200 and *B. subtilis* and assessed enzymatic activity. Each protein exhibited uridylyltransferase activity  
201 similar to *L. monocytogenes* GlmR (Fig. 4B). To test for functional conservation of GlmR  
202 function *in vivo* we complemented the *L. monocytogenes*  $\Delta glmR$  mutant with codon optimized  
203 *glmR* homologues from *S. aureus* and *M. tuberculosis*. Despite the high sequence conservation  
204 and the conserved enzymatic activity *in vitro*, only the *S. aureus* homologue was able to  
205 complement lysozyme sensitivity (Fig. 4C). The *B. subtilis* GlmR homologue was also able to  
206 rescue lysozyme resistance of *L. monocytogenes*  $\Delta glmR$  mutant (Fig S6). Consistent with their  
207 ability to rescue lysozyme resistance, we found that complementation of the *L. monocytogenes*  
208  $\Delta glmR$  mutant with the *S. aureus* homologue but not the *M. tuberculosis* homologue restored  
209 UDP-GlcNAc levels (Fig. 4D). Taken together, these data suggest that the uridylyltransferase  
210 enzymatic function of GlmR is highly conserved, however the observation that *M. tuberculosis*  
211 CuvA cannot transcomplement an *L. monocytogenes*  $\Delta glmR$  mutant suggests additional  
212 mechanisms of GlmR regulation including potentially protein localization and/or post-  
213 translational modification (16, 19, 34).

#### 214 **GlmR uridylyltransferase activity is required for cell wall stress responses and virulence *in*** 215 ***vivo***

216 Our data suggested that GlmR can act as an accessory uridylyltransferase. Based on modeling  
217 against the crystal structure of the homologue PDB:2O2Z (Fig. 5A), we predicted D40, D41 and

218 N198 to be active site residues that when mutated to alanines would abolish catalytic activity.  
219 To test the hypothesis that uridylyltransferase activity is necessary for virulence we created a  
220 D40A D41A N198A mutant GlmR (GlmR3), purified the mutant protein and assessed  
221 uridylyltransferase activity. Activity of the GlmR3 mutant was ~100-fold reduced in an in vitro  
222 biochemical assay compared to wild type GlmR (Fig. 3A,B). Complementation of a *glmR* mutant  
223 with *glmR3* was unable to rescue lysozyme sensitivity (Fig 5B) despite equal or even increased  
224 levels of expression compared to the wild type GlmR complement (Fig. S7) Finally to test the  
225 hypothesis that uridylyltransferase activity is important for virulence we performed infected mice  
226 and quantified bacterial burdens in an *in vivo* model of disseminated Listeriosis. In contrast to  
227 complementation with wild type GlmR, the GlmR3 mutant was unable to rescue the virulence  
228 defect of the  $\Delta glmR$  mutant (Fig. 5C). Taken together, these data suggest that the  
229 uridylyltransferase activity of GlmR is essential for mediating cell wall stress responses during  
230 infection to facilitate virulence of *L. monocytogenes*.

## 231 Discussion

232 GlmR is a highly conserved protein that is essential for virulence in *L. monocytogenes* and *M.*  
233 *tuberculosis*, but whose function remains largely unknown (16, 19, 20). In this study we  
234 discovered that GlmR has conserved uridylyltransferase activity that facilitates cell wall stress  
235 responses during infection. Our findings are also consistent with a recent study utilizing *t*-Cin  
236 hypersensitive *L. monocytogenes glmR:Himar1* mutants which identified suppressor mutations  
237 in genes involved in the biosynthesis of UDP-GlcNAc (53). When the *glmR: Himar1* mutant was  
238 engineered to overexpress *glmU* growth in *t*-Cin was fully restored, whereas overexpression of  
239 *glmS*, or *glmM* only partially restored resistance to *t*-Cin further supporting the idea that GlmR is  
240 involved in the biosynthesis of UDP-GlcNAc and that the terminal step of the GlmSMU pathway  
241 is rate limiting (53). Deciphering the activities of proteins of unknown function, such as GlmR, is  
242 a major challenge not only in microbial pathogenesis but in biology at large. Indeed, 25% of

243 predicted biochemical reactions do not have an assigned enzyme, suggesting that many  
244 proteins of unknown function have enzymatic activity (35, 36). Recent metabolomics  
245 approaches such as activity-based metabolomics have shown great promise in identifying these  
246 functions (36, 37). Combining parallel screening approaches such as genetics, transcriptomics,  
247 proteomics, and metabolomics generates targeted hypotheses about the roles of proteins of  
248 unknown function in physiological processes. In this study an untargeted metabolomics  
249 approach combined with a classical bacterial genetics suppressor screen allowed us to discover  
250 the uridyltransferase activity possessed by GlmR.

251 Although GlmR has potentially separable functions in both central metabolism and cell wall  
252 homeostasis (22), our identification of suppressor mutations that rescue virulence through  
253 restoration of UDP-GlcNAc levels suggests that GlmR's role in cell wall homeostasis is critical  
254 during infection. GlmR's function in promoting cytosolic survival further suggests that bacteria  
255 experience cell wall stress in the cytosol, however the cytosolic CAD responsible for imparting  
256 cell wall stress is unknown. Guanylate Binding Proteins (GBPs) and Lysozyme are not  
257 responsible for the cytosolic cell wall stress as GlmR is required for cytosolic survival even in  
258 *Gbp<sup>Chr3-/-</sup>* and *LysM<sup>-/-</sup>* macrophages (16, 38). Future identification of the cytosolic CADs  
259 targeting the bacterial cell wall will illuminate novel host defense pathways, not only against *L.*  
260 *monocytogenes*, but also other bacteria that invade the cytosol, including both canonical and  
261 non-canonical cytosolic pathogens such as *M. tuberculosis* and *S. aureus*. Furthermore, other  
262 bacterial pathogens which require GlmR for survival and virulence, such as *S. aureus* (21) and  
263 *M. tuberculosis* (19, 20), likely require GlmR to deal with cell wall stress in their conventional  
264 replication niches.

265 We found that GlmR uridyltransferase activity is conserved in *S. aureus* and *M. tuberculosis*,  
266 representatives of the Firmicutes and Actinobacteria phyla. This conservation combined with its  
267 essential role in virulence of a number of important pathogens suggest that it may be an

268 attractive drug candidate. Indeed, both the acetyl- and uridylyltransferase activities of *M.*  
269 *tuberculosis* GlmU have been targeted by small molecules as a novel antibiotic strategy (39).  
270 Whether uridylyltransferase inhibitors of GlmU could also bind and inhibit GlmR will need to be  
271 assessed. Among GlmR homologues, the N-terminal putative nucleotide binding region is most  
272 highly conserved. This raises important questions not only about the design of GlmR small  
273 molecule inhibitors, but also about substrate specificity of GlmR homologues and whether  
274 different GlmR proteins may have flexibility to catalyze different reactions with regard to the  
275 sugar component. Indeed, this may explain why GlmR appears to have separable roles in both  
276 cell wall homeostasis and gluconeogenic metabolism. Crystal structures of GlmR homologues in  
277 complex with their substrates will be critical both for antibiotic development and an  
278 understanding of the potential promiscuity of these enzymes.

279 GlmR uridylyltransferase activity is conserved, but the ability to transcomplement  
280 *L.monocytogenes*  $\Delta glmR$  mutants is not, suggesting that regulation of GlmR activity is essential.  
281 In *L. monocytogenes*, GlmR is upregulated at the protein level by cell wall stress (16), but the  
282 underlying mechanism of this upregulation remains unknown. Additionally, GlmR is  
283 phosphorylated by PASTA kinases in *L. monocytogenes*, *B. subtilis*, and *M. tuberculosis*,  
284 however the phosphorylation sites differ and what effect phosphorylation may have on the  
285 enzymatic activity is similarly unknown (16, 19, 40). Subcellular localization of GlmR may also  
286 contribute to its regulation as GlmR localization patterns in *B. subtilis* and *M. tuberculosis* are  
287 dissimilar (19, 22, 34, 41). Finally, recent studies suggested that GlmR may also act  
288 allosterically to regulate the function of GlmS in *B. subtilis* (26, 29). Although we were unable to  
289 observe this interaction in *L. monocytogenes*, GlmR functioning as an allosteric regulator of  
290 GlmS and as a functional uridylyltransferase are not mutually exclusive and indeed could act  
291 synergistically. Identification of mutations which abolish GlmS-GlmR interaction but not  
292 enzymatic activity and vice versa are necessary to separate and test these ideas.

293 This study identified that GlmR, a protein required for *L. monocytogenes* and *M. tuberculosis*  
294 virulence, is an accessory uridyltransferase necessary for UDP-GlcNAc synthesis in the context  
295 of cell wall stress. Similar to MurA and MurZ in *S. aureus* (33), this highlights that virulence  
296 determinants can be redundant with essential housekeeping enzymes. Often these accessory  
297 enzymes are upregulated in the context of stress, such as during infection or antibiotic treatment  
298 as is the case with GlmR and MurZ, respectively (33). Indeed GlmR's enzymatic activity may  
299 have gone previously undiscovered despite its importance due to the protein's low expression  
300 during normal laboratory culture with rich media. Additionally, with a potential exception in *S.*  
301 *aureus* (21), GlmR is likely not essential under laboratory conditions due to sufficient  
302 uridyltransferase activity of GlmU. Conversely, even in a situation where GlmR complemented  
303 GlmU uridyltransferase activity, GlmU would still be essential due to its acetyl-transferase  
304 function. Future analysis of virulence determinants of unknown function through parallel  
305 screening approaches may reveal this redundancy to be even more pervasive.

306

## 307 **Methods**

### 308 ***Listeria monocytogenes* strains and culture**

309 All *L. monocytogenes* strains used for experiments in this study were 10403S background. The  
310  $\Delta$ *glmR* mutant was described previously (14). *L. monocytogenes* was grown overnight in BHI at  
311 30°C for all experiments except as described for metabolomic analysis.

### 312 **Construction of *L. monocytogenes* strains**

313 Homologue complementation genes used in Figure 4 were created with gBlocks (IDT) that were  
314 codon-optimized for *L. monocytogenes* and inserted into pIMK2 (42) under control of the  
315 constitutive pHelp promoter. The complementation construct used in Fig S4 was not codon-

316 optimized and inserted into pPL2e under control of a theophylline inducible riboswitch as  
317 previously described (43). Constructs were cloned in XL1-Blue *E. coli* with 30µg/mL Kanamycin  
318 for pIMK2 and 2µg/mL Erythromycin for pPL2e as appropriate and shuttled into *L.*  
319 *monocytogenes* through conjugation with SM10 or S17 *E. coli*.

## 320 **Suppressor Selection**

321 A Himar 1 Tn mutant library was created in a  $\Delta glmR$  mutant background as described  
322 previously (44). Aliquots of library were thawed, diluted 1:1000-10000 in PBS and inoculated  
323 1:50 into 1mL of LB with 1mg/mL lysozyme and 0.1µM staurosporine in pentaplicate. 50µL of  
324 cultures were plated at 0 hours on LB and 6 hours on LB 1mg/mL lysozyme. This selection was  
325 carried out four times and 313 out of 476 resulting colonies were secondarily screened in BHI  
326 with lysozyme 1mg/mL staurosporine 0.1µM. Transposon mutations in the remaining  
327 suppressors were identified by 2-step PCR using transposon specific and degenerate primers  
328 followed by sanger sequencing using and were confirmed by PCR with diagnostic primers (45).  
329 To determine whether identified transposon mutations were causative, all unique transposons  
330 were transduced into a fresh  $\Delta glmR$  background and reconfirmed with diagnostic PCR,  
331 sequencing, and rescue of the  $\Delta glmR$  mutant lysozyme sensitivity with overnight growth in  
332 1mg/mL lysozyme in BHI.

## 333 **Phage Transduction**

334 Phage transductions were performed as previously described (46). Briefly, U153 phage stocks  
335 were propagated with MACK *L. monocytogenes* grown overnight in LB at 30°C. MACK cultures  
336 were pelleted and resuspended in LB with 10mM MgCl<sub>2</sub> and 10mM CaSO<sub>4</sub> and mixed with  
337 0.7% LB agar 10mM MgCl<sub>2</sub> 10mM CaSO<sub>4</sub> at 42°C and immediately poured on LB plates and  
338 incubated overnight at 30°C. Plaque lysate was soaked out with 10mM Tris pH 7.5 10mM  
339 MgCl<sub>2</sub> 10mM CaSO<sub>4</sub> buffer, and sterilized by 0.2µm filtration or addition of 1:3 volume

340 chloroform. Donor plaque lysates were prepared using the same conditions and used to infect  
341 recipient  $\Delta glmR$  cultures for 1 hour at room temperature before being plated on erythromycin  
342 selection at 37°C.

### 343 **Lysozyme Sensitivity**

344 Overnight 30°C static BHI cultures were backdiluted 1:50 into 96-well plates containing BHI or  
345 BHI with lysozyme at 1mg/mL. Plates were grown at 37°C with continuous shaking for 12 hours  
346 in an Eon or Synergy HT Microplate Spectrophotometer (BioTek Instruments, Inc., Winooski,  
347 VT) and OD<sub>600</sub> was read every 15 minutes.

### 348 **Plaque Assay**

349 The plaque assay was performed as described (47) except that the MOI was adjusted for  
350 optimal plaque number and an additional plug was added to wells at 3 days to facilitate an  
351 additional 3 days of plaque growth. At 6 days wells were stained with 0.3% crystal violet and  
352 washed with water. After staining the dishes were scanned and plaque areas were quantified  
353 with ImageJ. All strains were assayed in biological triplicate and the plaque areas of each strain  
354 were normalized to wild-type plaque size within each replicate.

### 355 **Metabolite Extraction**

356 Overnight 30°C static BHI cultures were washed with PBS and backdiluted 1:50 into 50mL of  
357 *Listeria* synthetic media (LSM) baffled flasks 37°C shaking and grown to an OD<sub>600</sub> of ~0.4.  
358 LSM is a derivative of Improved Minimal Media developed by Phan-thanh and Gorman (48) with  
359 several component changes (49). For metabolomic experiments we reduced the level of MOPS  
360 to 1/5<sup>th</sup> the normal amount to reduce background MS signal. 5mL of culture was deposited by  
361 vacuum filtration onto a 0.2 µm nylon membrane (47 mm diameter) in duplicate. The membrane  
362 was then placed (cells down) into 1.5 ml cold (-20°C or on dry ice) extraction solvent



363 (20:20:10 v/v/v acetonitrile, methanol, water) in a 60mm petri dish and swirled. After a few  
364 moments the filter was inverted (cells up) and solvent was passed over the surface of the  
365 membrane several times to maximize extraction. Finally, the cell extract was stored at  $-80^{\circ}\text{C}$ .  
366 Extracts were pelleted at 21000 rcf at  $4^{\circ}\text{C}$  for 10 minutes.  $\sim 200\mu\text{L}$  of extract normalized to OD  
367 was dried with  $\text{N}_2$  gas. Extracts were resuspended in  $70\mu\text{L}$  of HPLC grade water and pelleted at  
368 21000 rcf at  $4^{\circ}\text{C}$  for 10 minutes to remove particulates. All cultures were extracted in biological  
369 triplicate or quadruplicate and in technical duplicate.

### 370 **Metabolite quantification and analysis**

371 Metabolite quantification and analysis was performed with the same instrument and  
372 chromatography set up as previously described (50). Briefly, samples were run through an  
373 ACQUITY UPLC<sup>®</sup> BEH C18 column in a 18 minute gradient with Solvent A consisting of 97%  
374 water, 3% methanol, 10 mM tributylamine (TBA), 9.8 mM acetic acid, pH 8.2 and Solvent B  
375 being 100% methanol. Gradient was 5% Solvent B for 2.5 minutes, gradually increased to 95%  
376 Solvent B at 18 minutes, held at 95% Solvent B until 20.5 minutes, returned to 5% Solvent B  
377 over 0.5 minutes, and held at 5% Solvent B for the remaining 4 minutes. Ions were generated  
378 by heated electrospray ionization (HESI; negative mode) and quantified by a hybridquadrupole -  
379 high-resolution mass spectrometer (Q Exactive orbitrap, Thermo Scientific). MS scans consisted  
380 of full MS scanning for 70-1000  $m/z$  from time 0–18 min except MOPS  $m/z$  of 208-210 was  
381 excluded from 1.5-3 minutes. Metabolite peaks were identified using Metabolomics Analysis and  
382 Visualization Engine (MAVEN) (51, 52).

### 383 **Protein Purification**

384 GST tagged expression and purification scheme

385 GImR, GImR3 and GImU were cloned into pGex6P into XL1-Blues and expressed in Rosettas  
386 with pLysS. IPTG was added to 500  $\mu\text{M}$  to induce expression and 3 hours post induction cells

387 were pelleted, resuspended in PBS, and frozen at -80°C. Cell suspensions were thawed and  
388 lysed by sonication in the presence of protease inhibitors. Cell debris was pelleted and cell  
389 lysate was filtered with a 0.2 µM filter and loaded onto a prepacked glutathione resin column at  
390 4°C. The column was washed two times with 10 column volumes of cleavage buffer (25 mM Tris  
391 pH8 100 mM NaCl 1mM DTT) before elution. The column was loaded with 80 units of  
392 PreScission Protease in 960 µL of cleavage buffer and incubated overnight at 4°C. Elution was  
393 collected the next day by adding 3 mL of cleavage buffer to the column and concentrated  
394 between 15 µM and 23 µM. Protein was stored at 4°C and purity was assessed by SDS-Page  
395 and protein was quantified by BCA assay.

#### 396 Hist-Tagged expression and purification scheme

397 GlnR homologues were cloned into pET20b in XL1-blues and expressed in Rosettas with  
398 pLysS except for CuvA which was expressed from BL-21s from pET23. IPTG was added to  
399 500µM to induce expression and 3 hours post induction cells were pelleted, resuspended in  
400 PBS, and frozen at -80°C. Cell suspensions were thawed and lysed by sonication in the  
401 presence of protease inhibitors. Cell debris was pelleted and cell lysate was filtered with a  
402 0.2µm filter and loaded onto a HisTrap Ni column (GE Healthcare) at 4°C. The column was  
403 washed with PBS and PBS 25mM Imidazole before elution with 250mM Imidazole. Elutions were  
404 dialyzed overnight at 4°C into 10mM Tris pH 7.4 100mM NaCl which was prepared at 25°C and  
405 concentrated to between 6 and 22µM. Protein was stored at 4°C and purity was assessed by  
406 SDS-PAGE and protein was quantified by BCA assay.

407

#### 408 **Enzymatic Activity**

409 Reactions were carried out in 10mM Tris pH 7.4, 100mM NaCl, 1mM MgCl<sub>2</sub> buffer. Substrates  
410 were added at 100µM and purified *E. coli* GlnU (Galen Laboratory Supplies, GL01012), *L.*

411 *monocytogenes* GlmU, *L. monocytogenes* GlmR or GlmR homologues were added at 1µM and  
412 incubated at 37°C for 10 minutes. Protein was removed with a 3kDa MWCO filter ,resulting  
413 reaction mixtures were diluted 1 to 10 in solvent A and analyzed by tandem HPLC-MS and  
414 Maven software.

#### 415 **Bacterial Two-Hybrid**

416 GlmR and GlmS from both *L. monocytogenes* and *B. subtilis* were cloned in-frame into vectors  
417 pU18, pU18C, pKT25, and pKNT25 from the BACTH System Kit (Euromedex) using XbaI and  
418 KpnI. Constructs were made originally in TAM1 or XL1-Blue *E. coli* and then moved to BTH101  
419 *E. coli* for testing. Both blue/white screening on X-gal plates and β-Galactosidase assays were  
420 carried out as previously described (30).

#### 421 **Mouse infection**

422 Infections were performed as previously described (16). Briefly, 6 to 8-week-old female and  
423 male C57BL/6 mice were infected IV with 1×10<sup>5</sup> CFU. 48 hours post-infection, livers and  
424 spleens were harvested, homogenized in PBS with 0.1% NP-40, and plated for CFU. Two  
425 independent replicates of each experiment with 5 mice per group were performed.

#### 426 **Ethics statement**

427 Mice were cared for according to the recommendations of the NIH, published in the Guide for  
428 the Care and Use of Laboratory Animals. All techniques used were reviewed and approved by  
429 the University of Wisconsin-Madison Institutional Animal Care and Use Committee (IACUC)  
430 under the protocol M005916.

#### 431 **Statistical Analysis**

432 Prism 6 (GraphPad Software) was used for statistical analysis of data. Means from two groups  
433 were compared with unpaired two-tailed Student's T-test. Means from more than two groups  
434 were analyzed by one-way ANOVA with a post-hoc LSD Test. Mann-Whitney Test was used to

435 analyze non-normal data from animal experiments. \* indicates a statistically significant  
436 difference (P is less than 0.05).

437

#### 438 **Acknowledgements**

439 This work was supported by R01 AI137070 (J.D.S.) and R01 AI097157 (J.P.D.).

#### 440 **Declaration of Interests**

441 The authors declare no competing interests.

442

#### 443 **References**

- 444 1. Goetz M, Bubert A, Wang G, Chico-Calero I, Vazquez-Boland JA, Beck M, Slaghuis J,  
445 Szalay AA, Goebel W. 2001. Microinjection and growth of bacteria in the cytosol of  
446 mammalian host cells. *Proc Natl Acad Sci U S A* 2001/09/27. 98:12221–12226.
- 447 2. Goetz M, Engelbrecht F, Goebel W. 2004. Inefficient Replication of *Listeria innocua* in the  
448 Cytosol of Mammalian Cells. *J Infect Dis* 393–401.
- 449 3. Brumell JH, Rosenberger CM, Gotto GT, Marcus SL, Finlay BB. 2001. SifA permits  
450 survival and replication of *Salmonella typhimurium* in murine macrophages. *Cell Microbiol*  
451 3:75–84.
- 452 4. Chen GY, McDougal CE, D’Antonio MA, Portman JL, Sauer J-D. 2017. A Genetic Screen  
453 Reveals that Synthesis of 1,4-Dihydroxy-2-Naphthoate (DHNA), but Not Full-Length  
454 Menaquinone, Is Required for *Listeria monocytogenes* Cytosolic Survival. *MBio*  
455 8:e00119-17.

- 456 5. Creasey EA, Isberg RR. 2012. The protein SdhA maintains the integrity of the Legionella-  
457 containing vacuole. *Proc Natl Acad Sci* 109:3481–3486.
- 458 6. Sampson TR, Napier BA, Schroeder MR, Louwen R, Zhao J, Chin C-Y, Ratner HK,  
459 Llewellyn AC, Jones CL, Laroui H, Merlin D, Zhou P, Endtz HP, Weiss DS. 2014. A  
460 CRISPR-Cas system enhances envelope integrity mediating antibiotic resistance and  
461 inflammasome evasion. *Proc Natl Acad Sci* 111:11163–11168.
- 462 7. Peng K, Broz P, Jones J, Joubert LM, Monack D. 2011. Elevated AIM2-mediated  
463 pyroptosis triggered by hypercytotoxic Francisella mutant strains is attributed to increased  
464 intracellular bacteriolysis. *Cell Microbiol* 13:1586–1600.
- 465 8. Portnoy DA, Chen\* C, Mitchell\* G. 2016. Strategies Used by Bacteria to Grow in  
466 Macrophages. *Microbiol Spectr* 4:1–22.
- 467 9. Mitchell G, Isberg RR. 2017. Innate Immunity to Intracellular Pathogens: Balancing  
468 Microbial Elimination and Inflammation. *Cell Host Microbe* 22:166–175.
- 469 10. Casanova JE. 2017. Bacterial Autophagy: Offense and Defense at the Host–Pathogen  
470 Interface. *Cell Mol Gastroenterol Hepatol* 4:237–243.
- 471 11. Eisenreich W, Dandekar T, Heesemann J, Goebel W. 2010. Carbon metabolism of  
472 intracellular bacterial pathogens and possible links to virulence. *Nat Rev Microbiol* 8:401–  
473 12.
- 474 12. Liu W, Zhou Y, Peng T, Zhou P, Ding X, Li Z, Zhong H, Xu Y, Chen S, Hang HC, Shao F.  
475 2018. N $\epsilon$ -fatty acylation of multiple membrane-associated proteins by Shigella IcsB  
476 effector to modulate host function. *Nat Microbiol* 3:996–1009.
- 477 13. Cheng MI, Chen C, Engström P, Portnoy DA, Mitchell G. 2018. Actin-based motility

- 478 allows *Listeria monocytogenes* to avoid autophagy in the macrophage cytosol. Cell  
479 Microbiol 20:e12854.
- 480 14. Sauer J-D, Witte CE, Zemansky J, Hanson B, Lauer P, Portnoy D a. 2010. Listeria  
481 monocytogenes triggers AIM2-mediated pyroptosis upon infrequent bacteriolysis in the  
482 macrophage cytosol. Cell Host Microbe 7:412–9.
- 483 15. Reniere ML, Whiteley AT, Portnoy DA. 2016. An In Vivo Selection Identifies Listeria  
484 monocytogenes Genes Required to Sense the Intracellular Environment and Activate  
485 Virulence Factor Expression. PLOS Pathog 12:e1005741.
- 486 16. Pensinger DA, Boldon KM, Chen GY, Vincent WJB, Sherman K, Xiong M, Schaezner AJ,  
487 Forster ER, Coers J, Striker R, Sauer J-D. 2016. The Listeria monocytogenes PASTA  
488 Kinase PrkA and Its Substrate YvcK Are Required for Cell Wall Homeostasis,  
489 Metabolism, and Virulence. PLOS Pathog 12:e1006001.
- 490 17. Smith HB, Li TL, Liao MK, Chen GY, Guo Z, Sauer J-D. 2021. Listeria monocytogenes  
491 MenI encodes a DHNA-CoA thioesterase necessary for menaquinone biosynthesis,  
492 cytosolic survival, and virulence. Infect Immun 89:e00792-20.
- 493 18. Görke B, Foulquier E, Galinier A. 2005. YvcK of Bacillus subtilis is required for a normal  
494 cell shape and for growth on Krebs cycle intermediates and substrates of the pentose  
495 phosphate pathway. Microbiology 151:3777–91.
- 496 19. Mir M, Prusic S, Kang C-M, Lun S, Guo H, Murry JP, Rubin EJ, Husson RN. 2014.  
497 Mycobacterial gene *cuva* is required for optimal nutrient utilization and virulence. Infect  
498 Immun 82:4104–17.
- 499 20. Griffin JE, Gawronski JD, DeJesus M a., Ioerger TR, Akerley BJ, Sasseti CM. 2011.  
500 High-resolution phenotypic profiling defines genes essential for mycobacterial growth and

- 501 cholesterol catabolism. PLoS Pathog 7:1–9.
- 502 21. Chaudhuri RR, Allen AG, Owen PJ, Shalom G, Stone K, Harrison M, Burgis TA, Lockyer  
503 M, Garcia-Lara J, Foster SJ, Pleasance SJ, Peters SE, Maskell DJ, Charles IG. 2009.  
504 Comprehensive identification of essential *Staphylococcus aureus* genes using  
505 Transposon-Mediated Differential Hybridisation (TMDH). BMC Genomics 10:291.
- 506 22. Foulquier E, Galinier A. 2017. Yvck, a protein required for cell wall integrity and optimal  
507 carbon source utilization, binds uridine diphosphate-sugars. Sci Rep 7:4139.
- 508 23. Barreteau H, Kovač A, Boniface A, Sova M, Gobec S, Blanot D. 2008. Cytoplasmic steps  
509 of peptidoglycan biosynthesis. FEMS Microbiol Rev 32:168–207.
- 510 24. Brown S, Santa Maria JP, Walker S. 2013. Wall Teichoic Acids of Gram-Positive  
511 Bacteria. Annu Rev Microbiol 67:313–336.
- 512 25. Jankute M, Grover S, Birch HL, Besra GS. 2014. Genetics of Mycobacterial  
513 Arabinogalactan and Lipoarabinomannan Assembly. Microbiol Spectr 2.
- 514 26. Patel V, Wu Q, Chandrangsu P, Helmann JD. 2018. A metabolic checkpoint protein  
515 GlmR is important for diverting carbon into peptidoglycan biosynthesis in *Bacillus subtilis*.  
516 PLOS Genet 14:e1007689.
- 517 27. Promadej N, Fiedler F, Cossart P, Dramsi S, Kathariou S. 1999. Cell wall teichoic acid  
518 glycosylation in *Listeria monocytogenes* serotype 4b requires *gtcA*, a novel, serogroup-  
519 specific gene. J Bacteriol 181:418–25.
- 520 28. Eugster MR, Morax LS, Hüls VJ, Huwiler SG, Leclercq A, Lecuit M, Loessner MJ. 2015.  
521 Bacteriophage predation promotes serovar diversification in *Listeria monocytogenes*. Mol  
522 Microbiol 97:33–46.

- 523 29. Foulquier E, Pompeo F, Byrne D, Fierobe HP, Galinier A. 2020. Uridine diphosphate N-  
524 acetylglucosamine orchestrates the interaction of GImR with either YvcJ or GImS in  
525 *Bacillus subtilis*. *Sci Rep* 10.
- 526 30. Battesti A, Bouveret E. 2012. The bacterial two-hybrid system based on adenylate  
527 cyclase reconstitution in *Escherichia coli*. *Methods* 58:325–334.
- 528 31. Pompeo F, Bourne Y, van Heijenoort J, Fassy F, Mengin-Lecreux D. 2001. Dissection of  
529 the Bifunctional *Escherichia coli* N -Acetylglucosamine-1-phosphate Uridyltransferase  
530 Enzyme into Autonomously Functional Domains and Evidence That Trimerization Is  
531 Absolutely Required for Glucosamine-1-phosphate Acetyltransferase Acti. *J Biol Chem*  
532 276:3833–3839.
- 533 32. Graupner M, Xu H, White RH. 2002. Characterization of the 2-phospho-L-lactate  
534 transferase enzyme involved in coenzyme F(420) biosynthesis in *Methanococcus*  
535 *jannaschii*. *Biochemistry* 41:3754–61.
- 536 33. Blake KL, O'Neill AJ, Mengin-Lecreux D, Henderson PJF, Bostock JM, Dunsmore CJ,  
537 Simmons KJ, Fishwick CWG, Leeds JA, Chopra I. 2009. The nature of *Staphylococcus*  
538 *aureus* MurA and MurZ and approaches for detection of peptidoglycan biosynthesis  
539 inhibitors. *Mol Microbiol* 72:335–343.
- 540 34. Foulquier E, Pompeo F, Bernadac A, Espinosa L, Galinier A. 2011. The YvcK protein is  
541 required for morphogenesis via localization of PBP1 under gluconeogenic growth  
542 conditions in *Bacillus subtilis*. *Mol Microbiol* 80:309–18.
- 543 35. Pouliot Y, Karp PD. 2007. A survey of orphan enzyme activities. *BMC Bioinformatics*  
544 8:244.
- 545 36. Sévin DC, Fuhrer T, Zamboni N, Sauer U. 2016. Nontargeted in vitro metabolomics for



- 546 high-throughput identification of novel enzymes in *Escherichia coli*. *Nat Methods*.
- 547 37. de Carvalho LPS, Zhao H, Dickinson CE, Arango NM, Lima CD, Fischer SM, Ouerfelli O,  
548 Nathan C, Rhee KY. 2010. Activity-based metabolomic profiling of enzymatic function:  
549 identification of Rv1248c as a mycobacterial 2-hydroxy-3-oxoadipate synthase. *Chem*  
550 *Biol* 17:323–32.
- 551 38. Rae CS, Geissler A, Adamson PC, Portnoy DA. 2011. Mutations of the *Listeria*  
552 *monocytogenes* peptidoglycan N-deacetylase and O-acetylase result in enhanced  
553 lysozyme sensitivity, bacteriolysis, and hyperinduction of innate immune pathways. *Infect*  
554 *Immunol* 2011/07/20. 79:3596–3606.
- 555 39. Sharma R, Khan IA. 2016. Mechanism and potential inhibitors of GlmU: a novel target for  
556 antimicrobial drug discovery. *Curr Drug Targets*.
- 557 40. Foulquier E, Pompeo F, Fretton C, Cordier B, Grangeasse C, Galinier A. 2014. PrkC-  
558 mediated phosphorylation of overexpressed YvcK protein regulates PBP1 protein  
559 localization in *Bacillus subtilis* mreB mutant cells. *J Biol Chem* 289:23662–9.
- 560 41. Mignolet J, Viollier PH. 2011. A sweet twist gets *Bacillus* into shape. *Mol Microbiol*  
561 80:283–285.
- 562 42. Monk IR, Gahan CGM, Hill C. 2008. Tools for functional postgenomic analysis of *Listeria*  
563 *monocytogenes*. *Appl Environ Microbiol* 74:3921–3934.
- 564 43. Pensinger DA, Aliota MT, Schaezner AJ, Boldon KM, Ansari IH, Vincent WJB, Knight B,  
565 Reniere ML, Striker R, Sauer J-D. 2014. Selective pharmacologic inhibition of a PASTA  
566 kinase increases *Listeria monocytogenes* susceptibility to  $\beta$ -lactam antibiotics. *Antimicrob*  
567 *Agents Chemother* 58:4486–94.

- 568 44. Zemansky J, Kline BC, Woodward JJ, Leber JH, Marquis H, Portnoy DA. 2009.  
569 Development of a mariner-based transposon and identification of *Listeria monocytogenes*  
570 determinants, including the peptidyl-prolyl isomerase PrsA2, that contribute to its  
571 hemolytic phenotype. *J Bacteriol* 191:3950–64.
- 572 45. Burke TP, Loukitcheva A, Zemansky J, Wheeler R, Boneca IG, Portnoy D a. 2014.  
573 *Listeria monocytogenes* Is Resistant to Lysozyme through the Regulation, Not the  
574 Acquisition, of Cell Wall-Modifying Enzymes. *J Bacteriol* 196:3756–3767.
- 575 46. Hodgson DA. 2000. Generalized transduction of serotype 1/2 and serotype 4b strains of  
576 *Listeria monocytogenes*. *Mol Microbiol*2000/01/29. 35:312–323.
- 577 47. Sun AN, Camilli A, Portnoy DA. 1990. Isolation of *Listeria monocytogenes* small-plaque  
578 mutants defective for intracellular growth and cell-to-cell spread. *Infect Immun* 58:3770–  
579 3778.
- 580 48. Luu P, Gorman T. 1997. Short communication A chemically defined minimal medium of  
581 *Listeria* for the optimal culture. *Int J Food Microbiol* 35:91–95.
- 582 49. Whiteley AT, Garelis NE, Peterson BN, Choi PH, Tong L, Woodward JJ, Portnoy DA.  
583 2017. c-di-AMP modulates *Listeria monocytogenes* central metabolism to regulate  
584 growth, antibiotic resistance and osmoregulation. *Mol Microbiol* 104:212–233.
- 585 50. Rydzak T, Garcia D, Stevenson DM, Sladek M, Klingeman DM, Holwerda EK, Amador-  
586 Noguez D, Brown SD, Guss AM. 2017. Deletion of Type I glutamine synthetase  
587 deregulates nitrogen metabolism and increases ethanol production in *Clostridium*  
588 *thermocellum*. *Metab Eng* 41:182–191.
- 589 51. Clasquin MF, Melamud E, Rabinowitz JD. 2012. LC-MS data processing with MAVEN: a  
590 metabolomic analysis and visualization engine. *Curr Protoc Bioinformatics Chapter*

591 14:Unit14.11.

592 52. Melamud E, Vastag L, Rabinowitz JD. 2010. Metabolomic Analysis and Visualization  
593 Engine for LC–MS Data. *Anal Chem* 82:9818–9826.

594 53. Sun L, Rogiers G, Michiels CW. 2021. The Natural Antimicrobial *trans*-Cinnamaldehyde  
595 Interferes with UDP-N-Acetylglucosamine Biosynthesis and Cell Wall Homeostasis in  
596 *Listeria monocytogenes*. *Foods* 10, 1666.

597

598

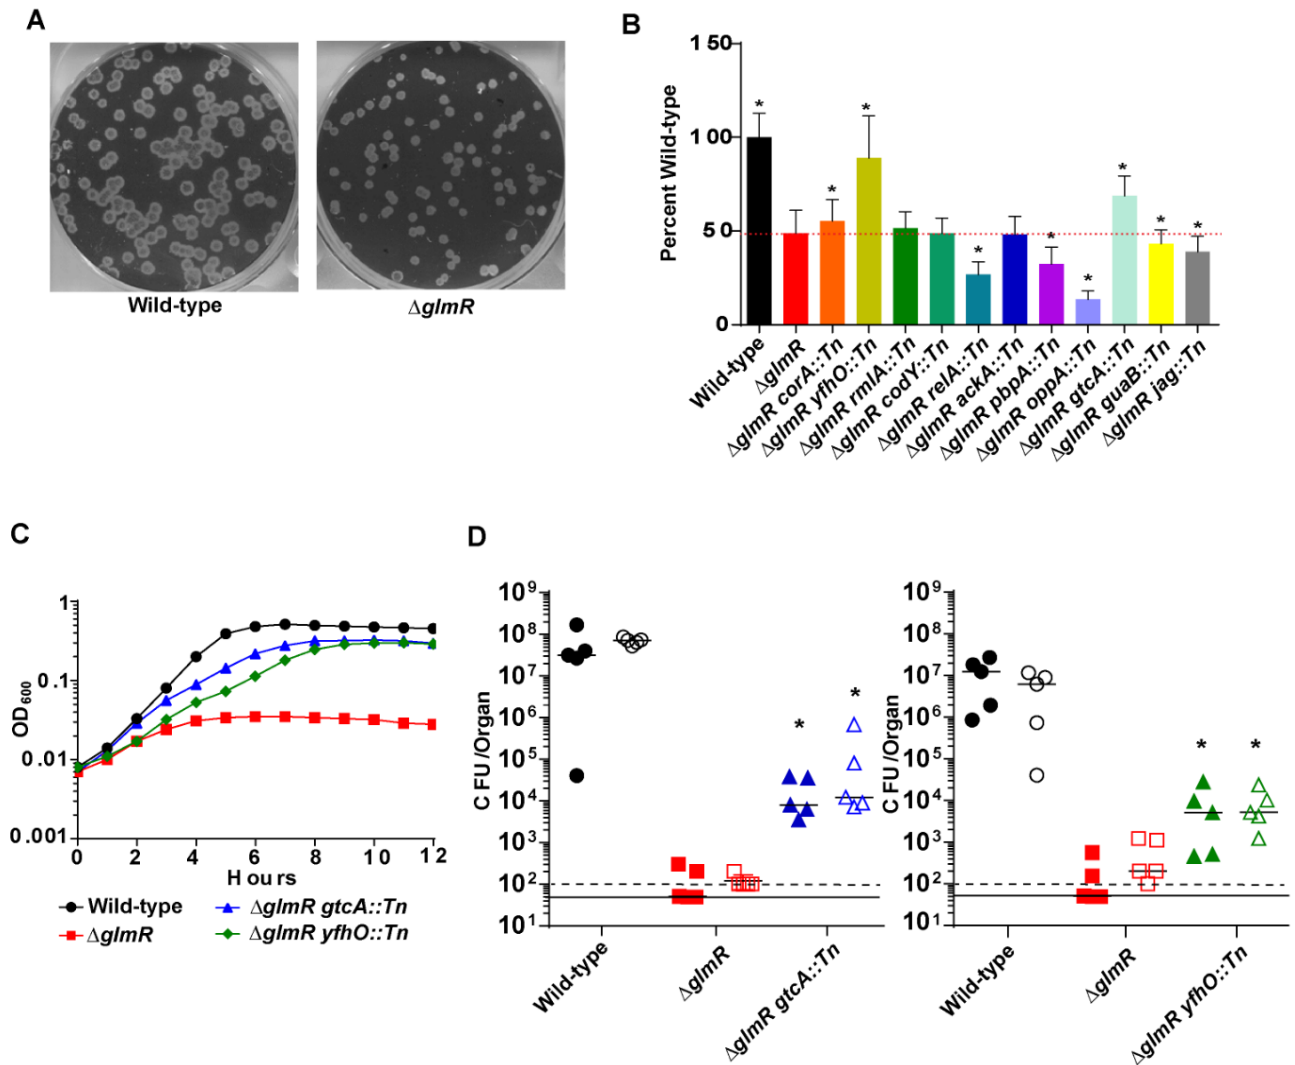

600

601 **Figure 1. Inhibition of GlcNAc WTA modification suppresses  $\Delta glmR$  mutant phenotypes**

602 **(A)** Representative image of plaques. **(B)** Plaque sizes  $\Delta glmR$  suppressors. Dotted red line

603 indicates  $\Delta glmR$  level. \* denotes significant differences from  $\Delta glmR$  by one-way ANOVA

604 ( $P < 0.05$ ). **(C)** Growth in BHI with 1mg/mL lysozyme. Graph is representative of greater than 3

605 biological replicates. **(D)** CFU from spleens (solid) and livers (open) of C57Bl/6 mice

606 intravenously infected with  $1 \times 10^5$  bacteria for 48 hours. The solid line and dotted line represent

607 the limit of detection for spleen and liver respectively. Data are representative of two

608 independent experiments. \* denotes significant differences by Mann-Whitney Test ( $P < 0.05$ )

609

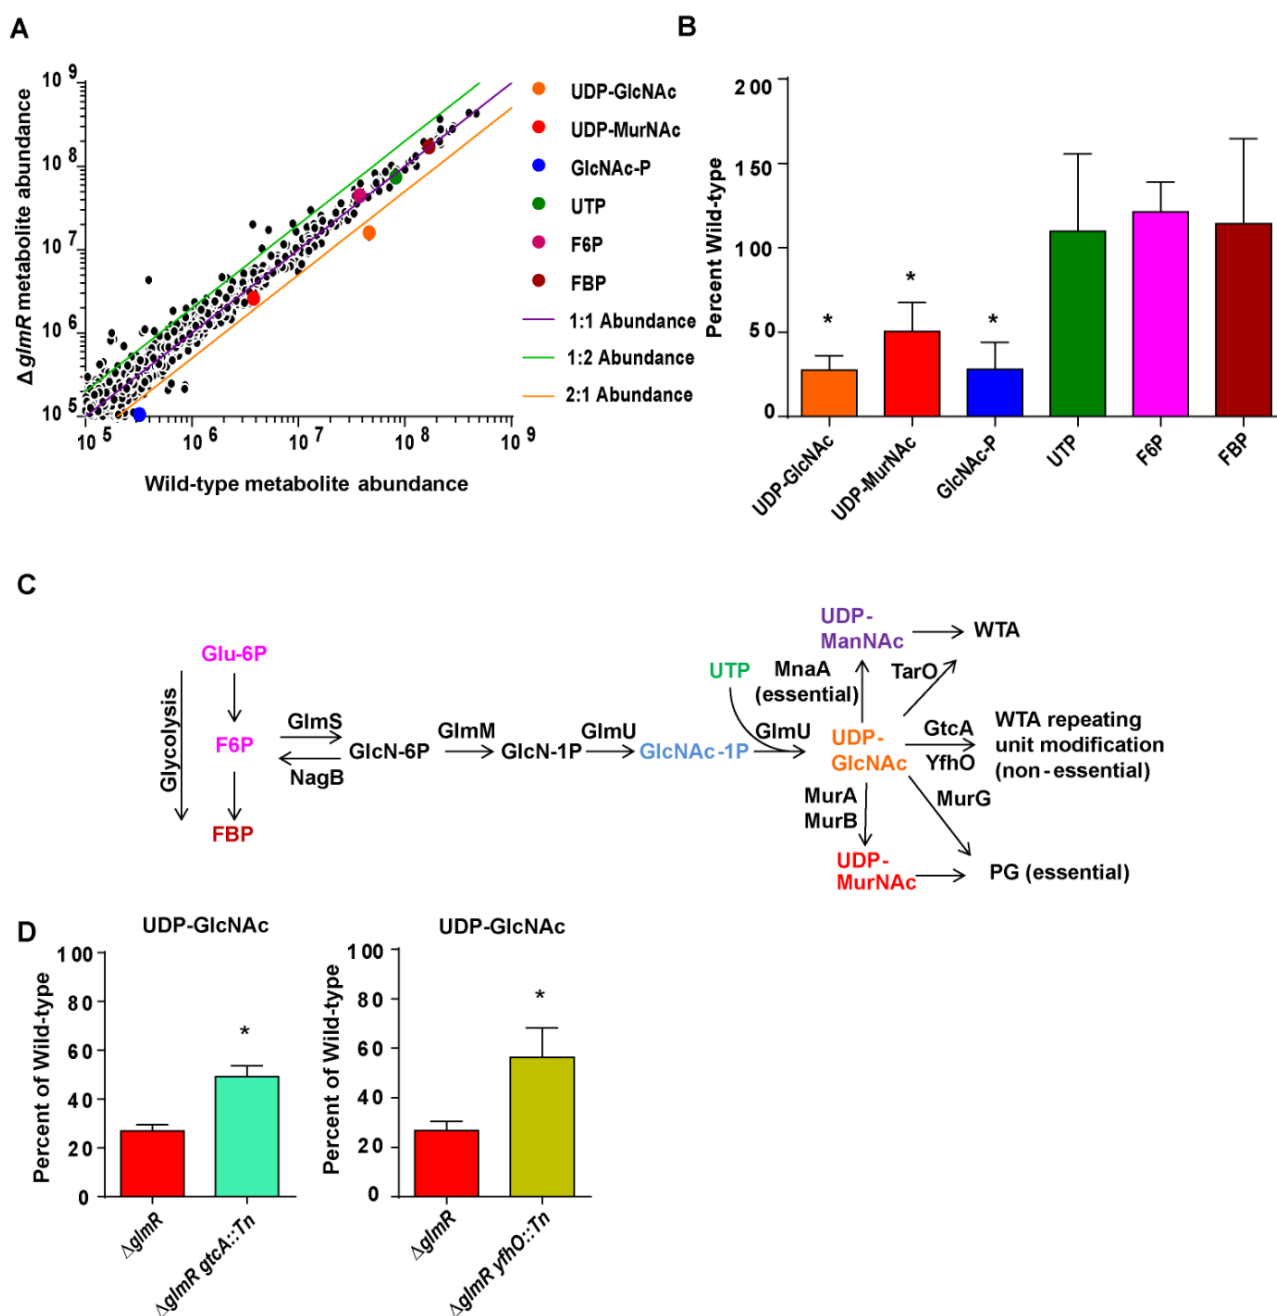

611 **Figure 2.  $\Delta glmR$  mutants are impaired in the production of GlmSMU pathway metabolites**  
 612 **(A)** Scatter plot of putative KEGG identified ions averaged across 4 biological replicates. **(B)**  
 613 Quantification of selected metabolites in the  $\Delta glmR$  mutant relative to wild-type across 4  
 614 biological replicates. \* denotes significant differences from wild-type by student's t-test ( $P < 0.05$ ).  
 615 **(C)** UDP-GlcNAc synthesis and utilization pathway **(D)** Quantification of selected metabolites in  
 616  $\Delta glmR$  suppressor mutants across 3 biological replicates. \* denotes significant differences from  
 617  $\Delta glmR$  by student's t-test ( $P < 0.05$ ).

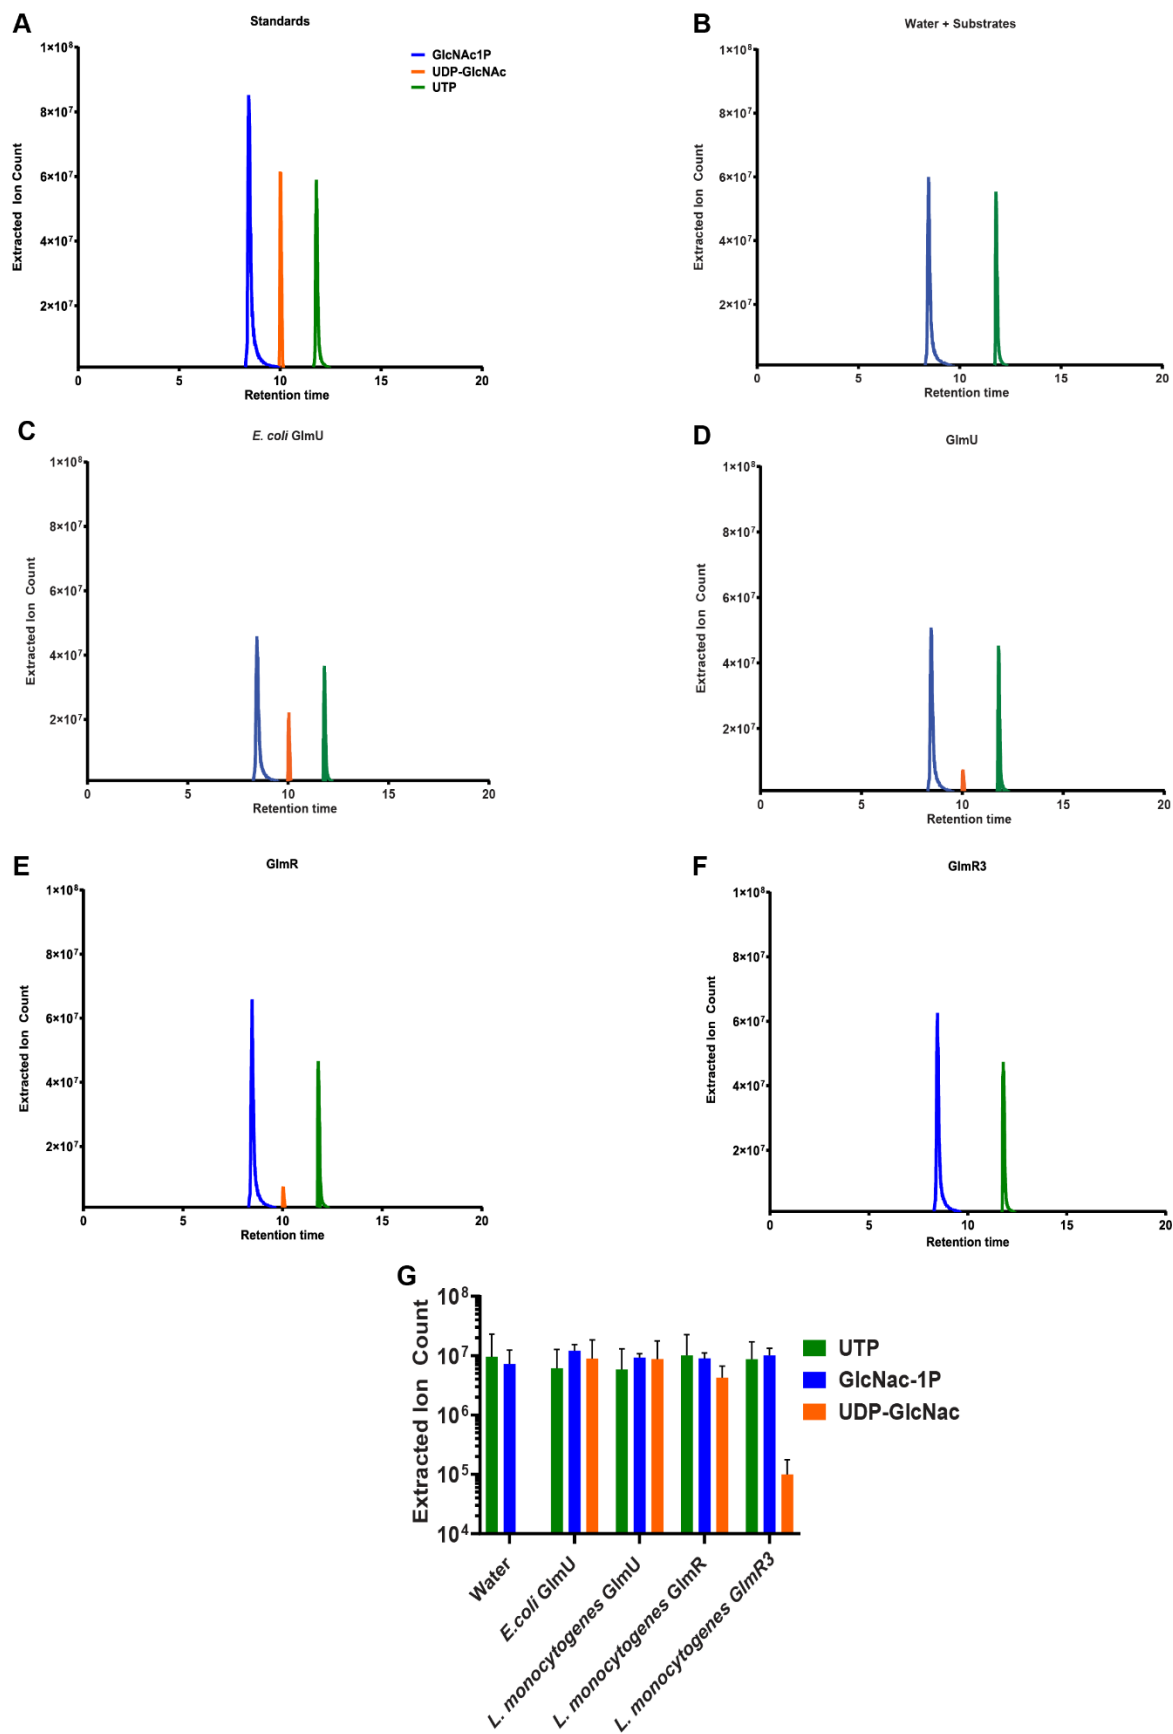

619 **Figure 3. GImR catalyzes the production of UDP-GlcNAc (A)** HPLC-MS analysis of reactions  
620 with 100 $\mu$ M substrates alone or in combination with 1 $\mu$ M purified GImU or GImR as indicated.  
621 Extracted Ion Counts for the relevant metabolites are indicated based on purified standards  
622 (GlcNAc-1P blue, UTP green, UDP-GlcNAc orange). **(B)** Quantification of selected metabolites  
623 (GlcNAc-1P blue, UTP green, UDP-GlcNAc orange) from reactions with 100 $\mu$ M substrates  
624 alone or in combination with water, 1 $\mu$ M *E.coli* GImU, GImU, GImR, and GImR3. Assays were  
625 performed in triplicate.  
626  
627  
628

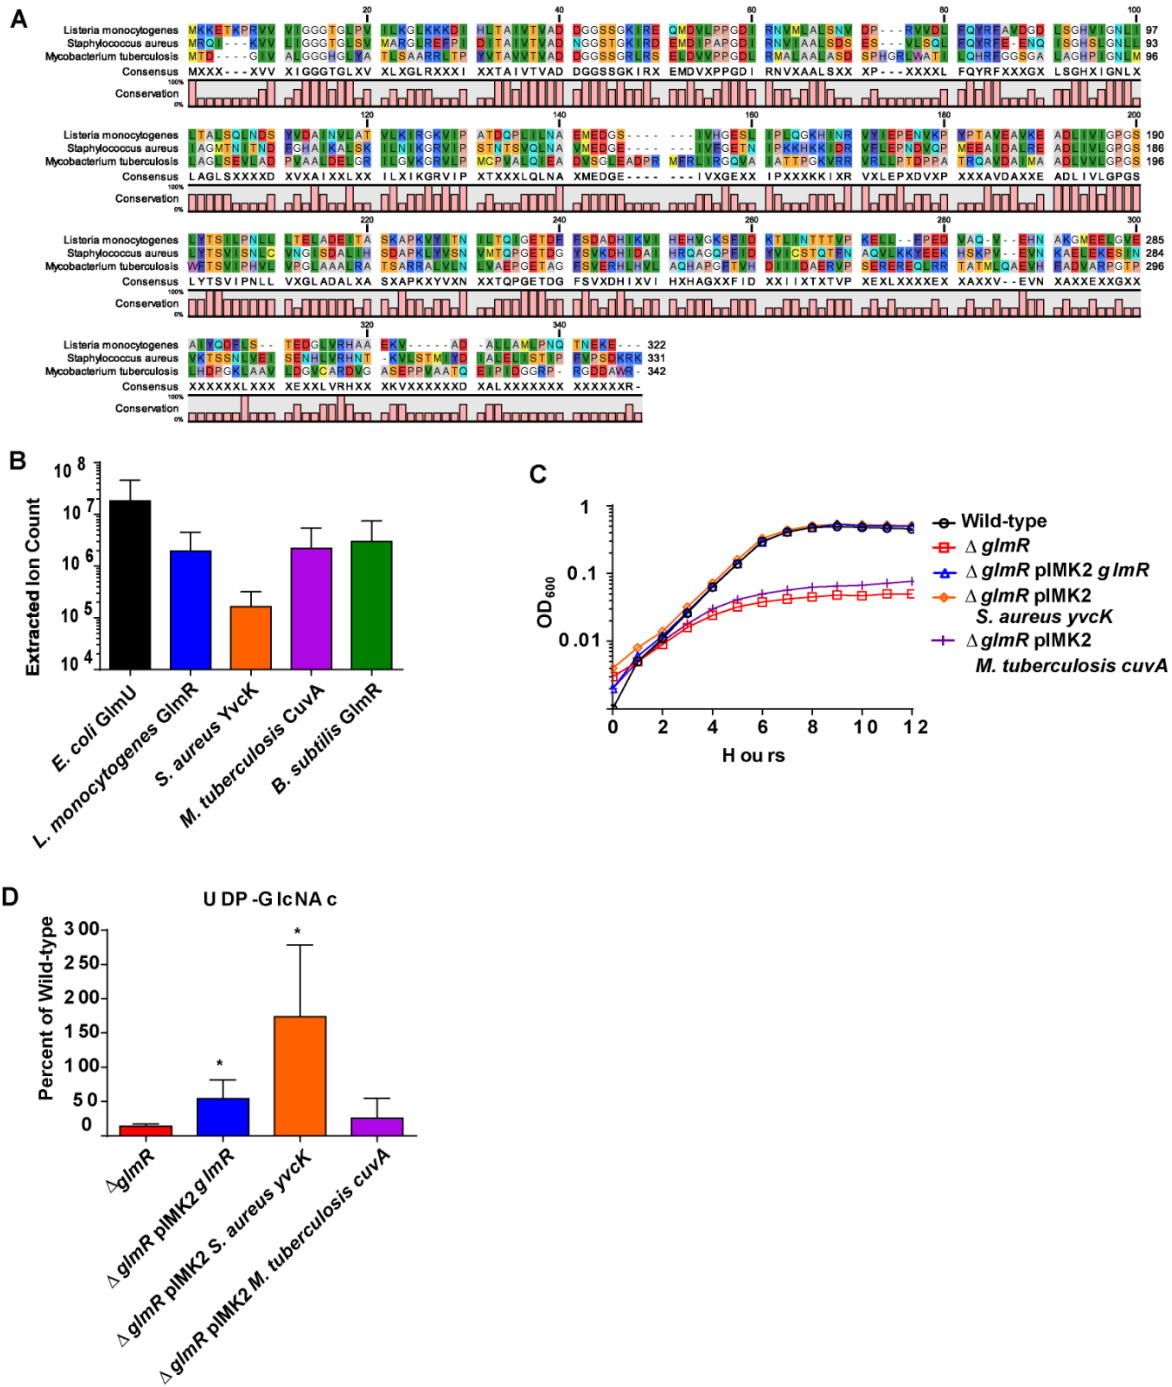

630 **Figure 4. GlmR uridylyltransferase function is conserved in *S. aureus* and *M. tuberculosis***  
 631 **(A)** GlmR homologues aligned using CLC Sequence Viewer 8.0. **(B)** Analysis of  
 632 uridylyltransferase activity of *E. coli* GImU and purified GlmR homologues by HPLC-MS. No  
 633 significant differences by ANOVA. **(C)** Transcomplementation of growth in BHI with 1mg/mL  
 634 lysozyme over 12 hours at 37°C. Graph is representative of greater than 3 biological replicates.  
 635 **(D)** Transcomplementation of UDP-GlcNAc levels relative to wild-type. \* denotes significant  
 636 differences from *glmR* by student's t-test ( $P < 0.05$ ).



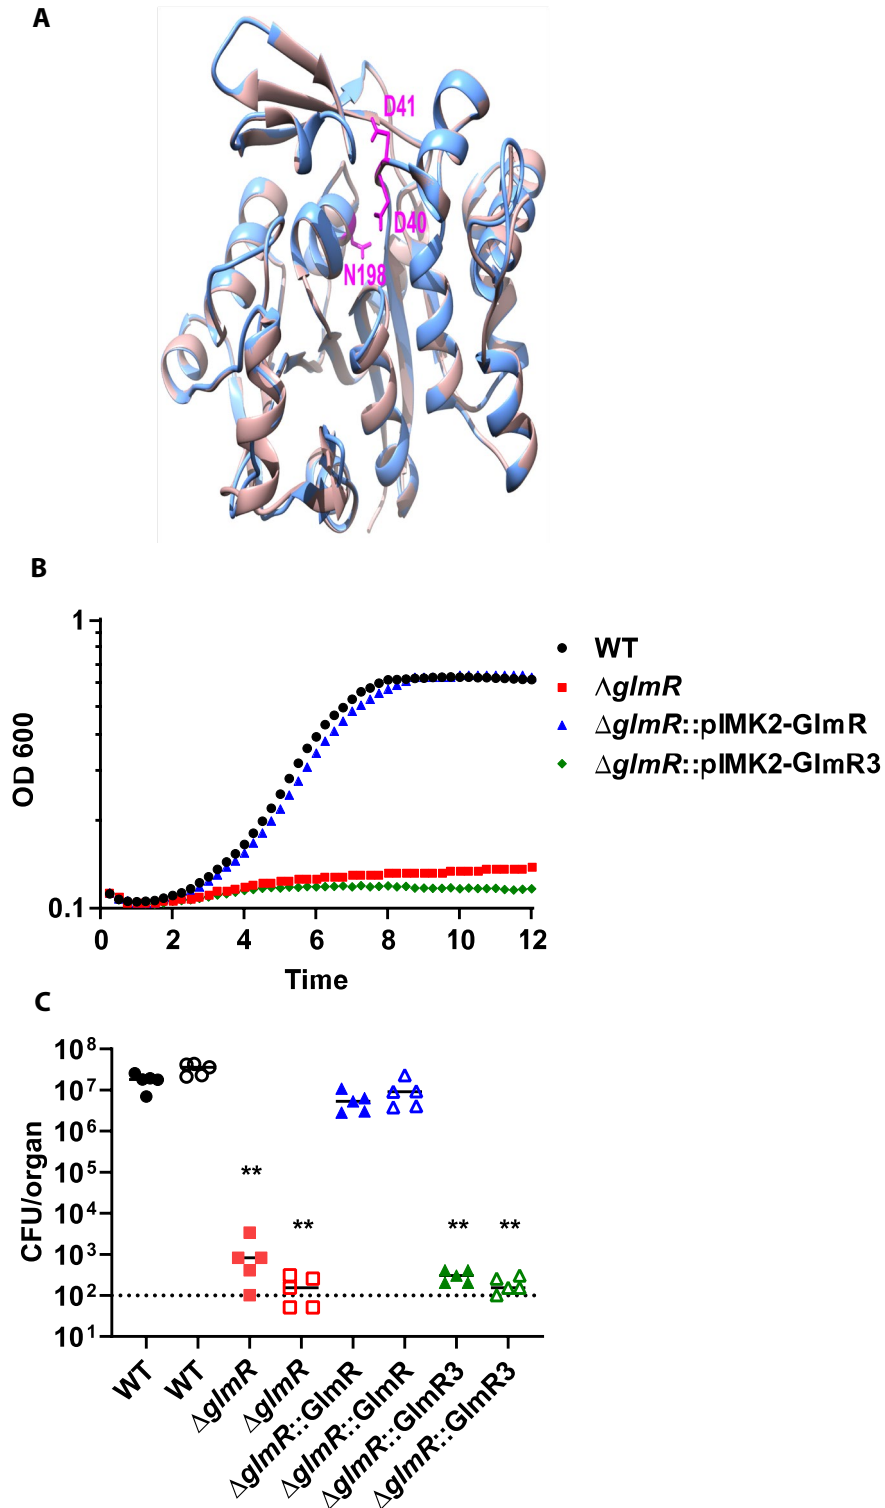

638 **Figure 5. GlmR uridylyltransferase activity necessary for virulence.** (A) The amino acid  
639 sequence of *L. monocytogenes* GlmR(light blue) is highly similar to that of *Bacillus halodurans*  
640 homolog (light pink) (~47% sequence identity, for which the crystal structure (PDB 2O2Z) has  
641 been solved. Based on this similarity, we used Phyre2 to generate an *Lm* GlmR structural

642 model, using the 2O2Z structure as a template, and found the two structures to be  
643 superimposable. Mutations made in the predicted catalytic site are highlighted (hot pink) D41,  
644 D40, N198 (from top, clock-wise). **(B)** Growth of WT,  $\Delta glmR$ ,  $\Delta glmR$ -*pIMK2-GlmR*, and  $\Delta glmR$ :  
645 *pIMK2-GlmR3* in BHI with 1 mg/mL of lysozyme over 12 hours at 37°C. Graph is representative  
646 of greater than 3 biological replicates. **(C)** C57/Bl6 mice were infected intravenously with  $1 \times 10^5$   
647 wild-type (black circles),  $\Delta glmR$  mutants (red squares),  $\Delta glmR::GlmR$  mutants (blue triangles),  
648  $\Delta glmR::GlmR3$  (green triangles) *in vivo*. Spleens (solid) and liver (open) were harvested 48  
649 hours post infection homogenized and plated for CFU. The median (solid bar) and limit of  
650 detection (dotted line) for each experiment indicated. Data are representative of two  
651 independent experiments with 5 mice each. \* indicates statistical significance by Mann-Whitney  
652 test ( $P < .05$ ).

653  
654  
655

| <b>Role</b>                                 | <b>lmo#</b> | <b>Name</b> | <b>Function</b>                                  | <b># of hits</b> | <b>#of insertions</b> |
|---------------------------------------------|-------------|-------------|--------------------------------------------------|------------------|-----------------------|
| WTA modification                            | 1079        | <i>yfhO</i> | WTA glycosylation                                | 9                | 2                     |
|                                             | 1081        | <i>rmlA</i> | Glucose-1-phosphate thymidyl transferase         | 1                | 1                     |
|                                             | 2549        | <i>gtcA</i> | WTA glycosylation                                | 1                | 1                     |
| GTP synthesis and metabolic stress response | 1096        | <i>guaA</i> | GMP synthase                                     | 1                | 1                     |
|                                             | 1280        | <i>codY</i> | Nutrient response regulator                      | 1                | 1                     |
|                                             | 1523        | <i>relA</i> | ppGpp synthase/reductase                         | 4                | 2                     |
|                                             | 2753        | <i>guaB</i> | Inosine 5'-monophosphate dehydrogenase           | 6                | 2                     |
| RNA binding                                 | 2853        | <i>Jag</i>  | Sporulation-related RNA binding protein          | 8                | 1                     |
| Transport                                   | 1064        | <i>corA</i> | Mg transport                                     | 4                | 2                     |
|                                             | 2195        | <i>oppB</i> | Oligopeptide ABC transporter                     | 9                | 1                     |
|                                             | 2196        | <i>oppA</i> | Oligopeptide ABC transporter                     | 15               | 2                     |
| Acetate metabolism                          | 1581        | <i>ackA</i> | Acetate kinase                                   | 39               | 1                     |
| Peptidoglycan synthesis                     | 1892        | <i>pbpA</i> | High molecular weight penicillin binding protein | 1                | 1                     |

656

657 **Table 1.  $\Delta glmR$  suppressor mutants**

658 A Himar 1 transposon mutant library in a  $\Delta glmR$  background was passaged through lysozyme  
659 selection. Transposon insertions were identified by sequencing and diagnostic PCR, transduced  
660 into a fresh  $\Delta glmR$  background and reconfirmed. Listed are the identified genes, general role  
661 they belong to, the number of hits identified in the selection, and the number of unique  
662 insertions.

663

664

665

666

667

668 **Supplementary Information for**

669 ***Listeria monocytogenes* GImR is an accessory uridylyltransferase essential for cytosolic**  
670 **survival and virulence**

671 Daniel A. Pensinger<sup>1\*</sup>, Kimberly V. Gutierrez<sup>1\*</sup>, Hans B. Smith<sup>1</sup>, William J.B. Vincent<sup>1</sup>, David S.  
672 Stevenson<sup>2</sup>, Katherine A. Black<sup>3</sup>, Krizia M. Perez-Medina<sup>1</sup>, Joseph P. Dillard<sup>1</sup>, Kyu Y. Rhee<sup>3</sup>,  
673 Daniel Amador-Noguez<sup>2</sup>, TuAnh N Huynh<sup>4</sup>, John-Demian Sauer<sup>1#</sup>

674

675 <sup>1</sup>Department of Medical Microbiology and Immunology, <sup>2</sup>Department of Bacteriology and

676 <sup>4</sup>Department of Food Science, University of Wisconsin-Madison, Madison, WI 53706 <sup>3</sup>Weill

677 Cornell Medical College, New York City, NY 10065

678 \*equal contributions

679 #Corresponding Author: Dr. John-Demian Sauer, Department of Medical Microbiology and  
680 Immunology, University of Wisconsin-Madison 1550 Linden Dr. Rm 4203, Madison WI, 53706  
681 USA. Phone: 608-263-1529. Fax: 608-262-8418. Email: sauer3@wisc.edu

682

683 **This PDF file includes:**

684

685       Supplementary methods

686       Figs. S1 to S7

687       Table S1

688       Supplementary References

689

690

691

692

693

694 **Supplementary Methods**

695 **Wheat Germ Agglutinin Staining**

696 1mL of overnight cultures in BHI at 37°C were pelleted, fixed in 4% paraformaldehyde in PBS,  
697 washed in PBS with 0.1% Tween (PBS-T), resuspended in 100µL PBS-T, and incubated with  
698 50µL of 0.1% Wheat Germ Agglutinin (WGA) for 5 minutes. Pellets were washed in PBS-T and  
699 stored at 4°C in the dark. Confocal microscopy was performed as previously described (43).

700

701

702

703

704

705

706

707

708

709

710

711

712

713

714

715

716

717

718

719

720 **Figure S1. GtcA is functionally inactivated by a Tn insertion**

721 Wild-type, *glmR*, and *glmR gtcA::Tn* strains were imaged and assessed for their ability to bind WGA

722 (red).

723

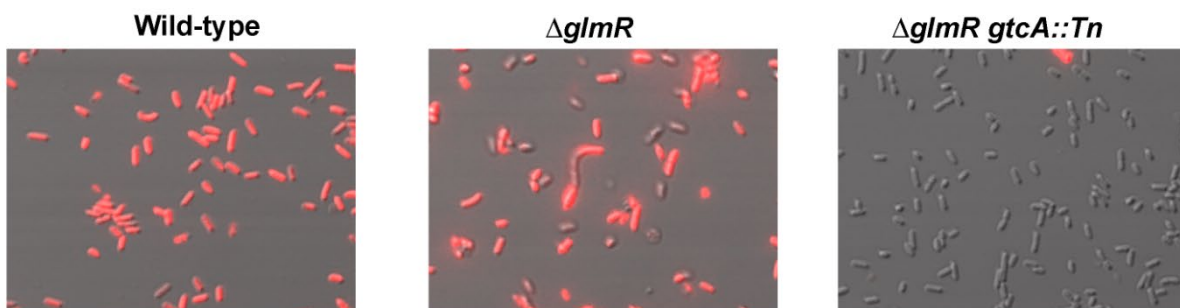

725

726

727 **Figure S2. GImS and GImR form homodimers**

728 **(A,B)** Bacterial 2-hybrid strains were plated on X-Gal and incubated for 24 hours at 30°C in

729 biological quadruplicate.

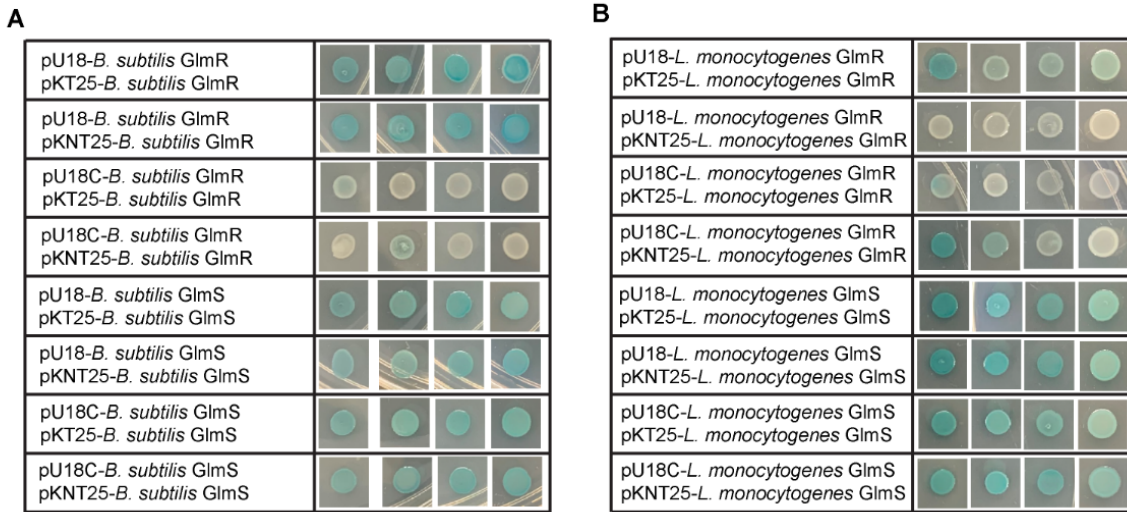

731

732 **Figure S3. *B. subtilis* GlmR interaction with GlmS**

733 **(A,B)** Bacterial 2-hybrid strains were plated on X-Gal and incubated for 24 hours at 30°C in  
734 biological quadruplicate. Bacterial 2-hybrid cultures were lysed and assayed for  $\beta$ -galactosidase  
735 activity in biological triplicate. Activity is normalized to the Zip positive control. The dotted red  
736 line indicates 10% of the Zip value. Strains are identified by a number and listed below. Control  
737 strains are green, GlmS-GlmR interaction test strains are red, and GlmS or GlmR homodimer  
738 strains are gold.



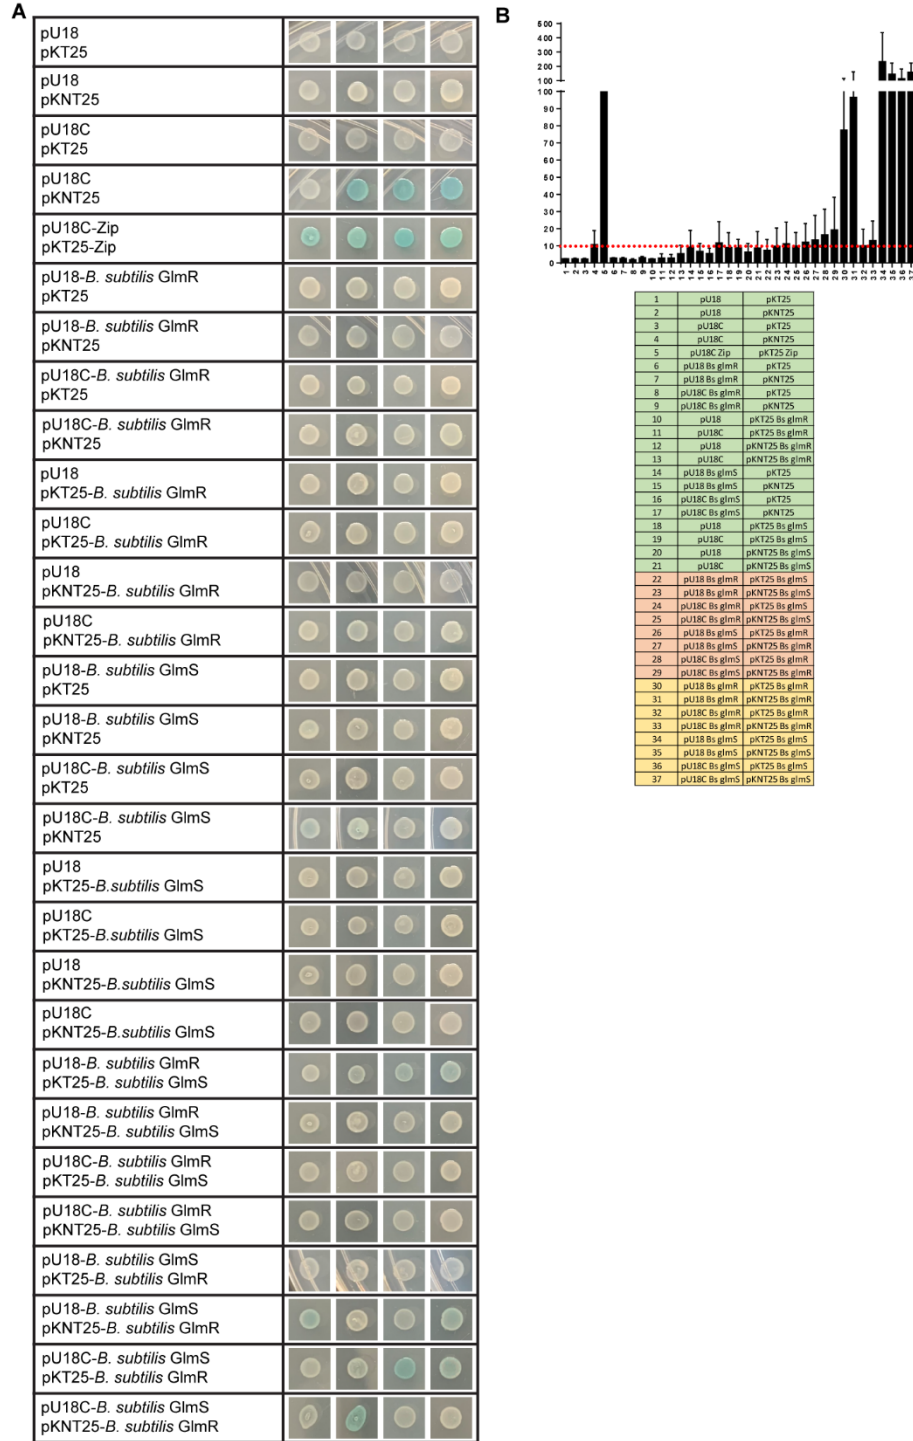

740

741

742 **Figure S4. *L. monocytogenes* GImR does not interact with GImS**

743 **(A) (B)** Bacterial 2-hybrid strains were plated on X-Gal and incubated for 24 hours at 30°C in  
744 biological quadruplicate. Bacterial 2-hybrid cultures were lysed and assayed for  $\beta$ -galactosidase  
745 activity in biological triplicate. Activity is normalized to the Zip positive control. The dotted red  
746 line indicates 10% of the Zip value. Strains are identified by a number and listed below. Control  
747 strains are green, GImS-GImR interaction test strains are red, and GImS or GImR homodimer  
748 strains are gold.

749

A

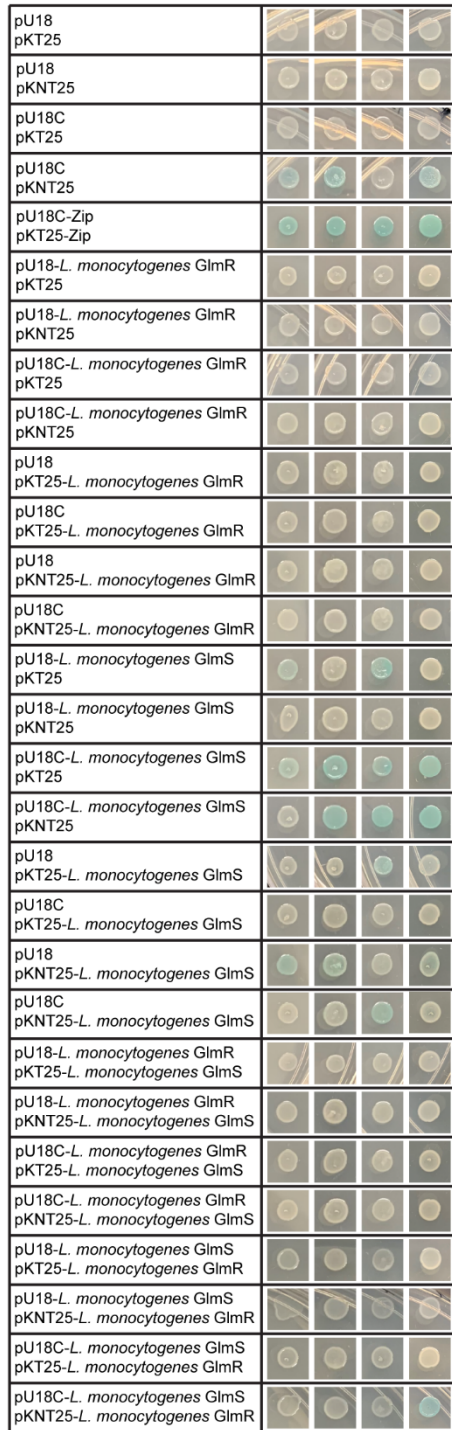

B

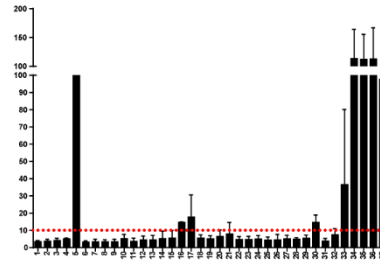

|    |               |                |
|----|---------------|----------------|
| 1  | pU18          | pKT25          |
| 2  | pU18          | pKNT25         |
| 3  | pU18C         | pKT25          |
| 4  | pU18C         | pKNT25         |
| 5  | pU18C-Zip     | pKT25-Zip      |
| 6  | pU18 Lm glmR  | pKT25          |
| 7  | pU18 Lm glmR  | pKNT25         |
| 8  | pU18C Lm glmR | pKT25          |
| 9  | pU18C Lm glmR | pKNT25         |
| 10 | pU18          | pKT25 Lm glmR  |
| 11 | pU18C         | pKT25 Lm glmR  |
| 12 | pU18          | pKNT25 Lm glmR |
| 13 | pU18C         | pKNT25 Lm glmR |
| 14 | pU18 Lm glmS  | pKT25          |
| 15 | pU18 Lm glmS  | pKNT25         |
| 16 | pU18C Lm glmS | pKT25          |
| 17 | pU18C Lm glmS | pKNT25         |
| 18 | pU18          | pKT25 Lm glmS  |
| 19 | pU18C         | pKT25 Lm glmS  |
| 20 | pU18          | pKNT25 Lm glmS |
| 21 | pU18C         | pKNT25 Lm glmS |
| 22 | pU18 Lm glmR  | pKT25 Lm glmS  |
| 23 | pU18 Lm glmR  | pKNT25 Lm glmS |
| 24 | pU18C Lm glmR | pKT25 Lm glmS  |
| 25 | pU18C Lm glmR | pKNT25 Lm glmS |
| 26 | pU18 Lm glmS  | pKT25 Lm glmR  |
| 27 | pU18 Lm glmS  | pKNT25 Lm glmR |
| 28 | pU18C Lm glmS | pKT25 Lm glmR  |
| 29 | pU18C Lm glmS | pKNT25 Lm glmR |
| 30 | pU18 Lm glmR  | pKT25 Lm glmS  |
| 31 | pU18 Lm glmR  | pKNT25 Lm glmS |
| 32 | pU18C Lm glmR | pKT25 Lm glmS  |
| 33 | pU18C Lm glmR | pKNT25 Lm glmS |
| 34 | pU18 Lm glmS  | pKT25 Lm glmR  |
| 35 | pU18 Lm glmS  | pKNT25 Lm glmR |
| 36 | pU18C Lm glmS | pKT25 Lm glmR  |
| 37 | pU18C Lm glmS | pKNT25 Lm glmR |

751

752

753 **Figure S5. *L. monocytogenes* GlmR lacks acetyltransferase activity**

754 HPLC-MS analysis of reactions with 100 $\mu$ M substrates alone or in combination with 1 $\mu$ M GlmU  
755 or GlmR. Peaks for the relevant metabolites are indicated (Acetyl-CoA black, GlcNAc-1P blue,  
756 UDP-GlcNAc orange).(B) Quantification of selected metabolites (GlcNAc-1P blue, UTP green,  
757 UDP-GlcNAc orange) from reactions with 100 $\mu$ M substrates alone or in combination with water  
758 , 1 $\mu$ M Heat Inactivated (HA) GlmR or Heat Inactivated (HA) GlmU. Assays were performed in  
759 triplicate.  
760

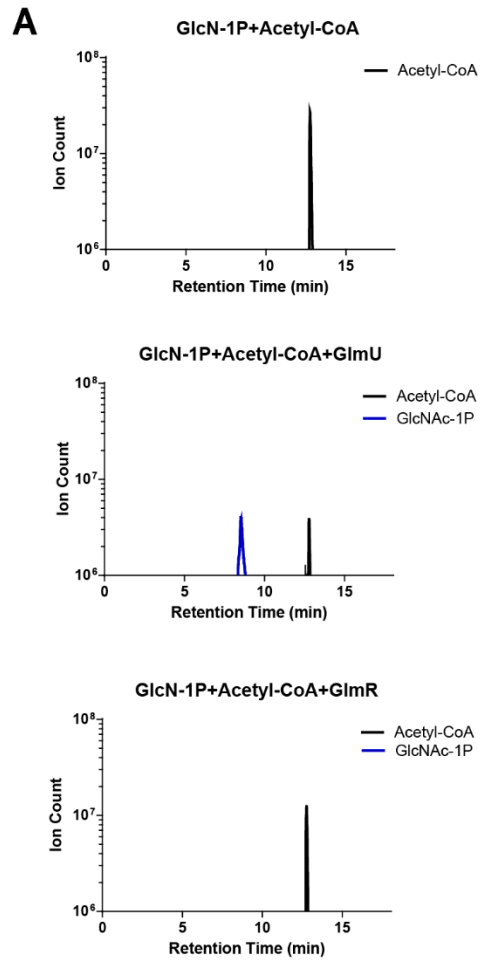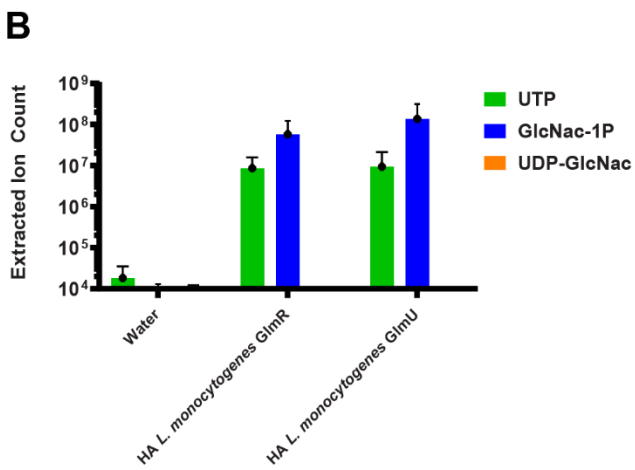

762

763

764 **Figure S6. *B. subtilis* GlmR rescues the cell wall defect of a  $\Delta$ glmR mutant**

765 Transcomplementation of growth in BHI with 1mg/mL lysozyme over 12 hours at 37°C. Graph is  
766 representative of greater than 3 biological replicates.

767

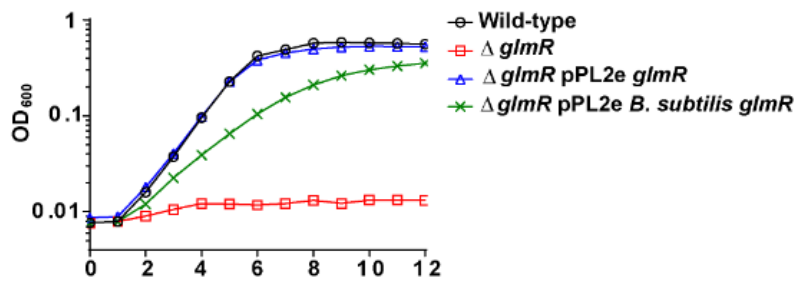

769

770 **Figure S7. GlmR3 equal or increased expression to WT GlmR**

771 Expression of GlmR in WT,  $\Delta glmR$ ,  $\Delta glmR:glmR$ , and  $\Delta glmR:glmR3$  at mid-log in BHI with 250  
772  $\mu\text{g/mL}$  lysozyme.

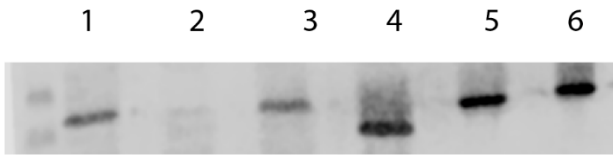

- |                                     |                                      |
|-------------------------------------|--------------------------------------|
| 1. WT                               | 4. $\Delta glmR$ pIMK2- <i>glmR3</i> |
| 2. $\Delta glmR$                    | 5. Recombinant GlmR                  |
| 3. $\Delta glmR$ pIMK2- <i>glmR</i> | 6. Recombinant GlmR3                 |

774

775

776 **Table S1 – Putative KEGG identified differential metabolites**

777 Putative KEGG identified metabolites with greater than 2-fold abundance differential between  
 778 wild-type and  $\Delta glmR$ , their m/z, abundance in wild-type and the *glmR* mutant, and ratio between  
 779 the two are listed.

780

| <b>Table S1– putative KEGG identified differential metabolites</b> |                                                           |                          |                                         |              |
|--------------------------------------------------------------------|-----------------------------------------------------------|--------------------------|-----------------------------------------|--------------|
| <b>Median M/Z</b>                                                  | <b>Kegg predicted metabolite</b>                          | <b>Wild-type average</b> | <b><math>\Delta glmR</math> average</b> | <b>Ratio</b> |
| 199.0011                                                           | D-Erythrose 4-phosphate                                   | 1.13E+05                 | 1.12E+06                                | 0.101704217  |
| 261.1342                                                           | Streptidine                                               | 3.92E+05                 | 4.36E+06                                | 0.090034284  |
| 332.0469                                                           | 3-[(2-Chlorobenzylidene)amino]-6H-dibenzo[b-d]pyran-6-one | 1.77E+05                 | 1.00E+06                                | 0.175920064  |
| 187.0976                                                           | Azelaic acid                                              | 3.73E+06                 | 2.02E+07                                | 0.184657409  |
| 275.1501                                                           | N-(4-Guanidinobutyl)-4-hydroxycinnamide                   | 1.72E+05                 | 8.18E+05                                | 0.210368222  |
| 209.0794                                                           | N4-Phosphoagmatine                                        | 1.85E+05                 | 8.45E+05                                | 0.219326987  |
| 157.0506                                                           | 2-Isopropylmaleate                                        | 5.27E+06                 | 1.73E+07                                | 0.304484059  |
| 459.0932                                                           | Anhydrochlortetracycline                                  | 1.36E+05                 | 4.22E+05                                | 0.323036636  |
| 217.0908                                                           | 2-Oxo-9-methylthiononanoic acid                           | 3.62E+05                 | 1.11E+06                                | 0.325882086  |
| 464.0982                                                           | Delphinidin 3-O-glucoside                                 | 2.29E+05                 | 7.01E+05                                | 0.326941165  |
| 217.0828                                                           | gamma-L-Glutamyl-D-alanine                                | 1.47E+05                 | 4.48E+05                                | 0.328082992  |
| 181.0506                                                           | 3-4-Dihydroxyphenylpropanoate                             | 3.42E+05                 | 1.03E+06                                | 0.332518102  |
| 336.0602                                                           | 5-Hydroxymethyldeoxycytidylate                            | 1.05E+05                 | 2.99E+05                                | 0.350062002  |
| 244.0073                                                           | Guanfacine                                                | 6.66E+05                 | 1.86E+06                                | 0.358515244  |
| 128.0104                                                           | Cyanuric acid                                             | 1.06E+05                 | 2.67E+05                                | 0.397410261  |
| 174.0771                                                           | 2-Benzimidazolylguanidine                                 | 1.51E+05                 | 3.71E+05                                | 0.406431227  |
| 277.1444                                                           | Dibutyl phthalate                                         | 1.92E+06                 | 4.69E+06                                | 0.409928425  |
| 440.1136                                                           | 9-Hydroxy-3-5-7-11-13-15-17-octaoxo-eicosanoyl-[acp]      | 4.44E+05                 | 1.06E+06                                | 0.41821093   |
| 189.0404                                                           | 4-Hydroxy-2-oxo-heptanedioate                             | 8.86E+06                 | 2.06E+07                                | 0.430467446  |
| 129.0194                                                           | Acetylpyruvate                                            | 1.31E+07                 | 3.00E+07                                | 0.43652598   |
| 215.1036                                                           | gamma-Glutamyl-gamma-aminobutyraldehyde                   | 4.55E+06                 | 1.04E+07                                | 0.438395715  |
| 279.0775                                                           | Methyl nigakinone                                         | 8.80E+05                 | 1.97E+06                                | 0.446892842  |
| 101.0605                                                           | Pentanoate                                                | 1.06E+06                 | 2.35E+06                                | 0.451956289  |
| 312.1242                                                           | Lauroilsine                                               | 1.26E+05                 | 2.75E+05                                | 0.457112993  |
| 165.0193                                                           | 4-Formylsalicylic acid                                    | 2.15E+06                 | 4.54E+06                                | 0.473787202  |
| 180.0794                                                           | Acetylcholine chloride                                    | 1.23E+05                 | 2.60E+05                                | 0.47405135   |
| 309.0649                                                           | Sulfadoxine                                               | 1.38E+05                 | 2.90E+05                                | 0.474682745  |
| 188.9515                                                           | 2-4-Dichlorobenzoate                                      | 1.66E+05                 | 3.37E+05                                | 0.493700679  |
| 284.1673                                                           | Isococculidine                                            | 2.01E+05                 | 4.04E+05                                | 0.496476805  |
| 482.0749                                                           | Peptide(N-Glu- Asp- Cystine)                              | 2.33E+05                 | 1.11E+05                                | 2.092764267  |



|          |                            |          |          |             |
|----------|----------------------------|----------|----------|-------------|
| 266.0702 | S-Ribosyl-L-homocysteine   | 2.35E+05 | 1.01E+05 | 2.323378813 |
| 281.1006 | 2-Aminoadenosine           | 2.83E+05 | 1.12E+05 | 2.533581026 |
| 298.0697 | Avenanthramide A           | 6.41E+05 | 2.49E+05 | 2.573129783 |
| 276.0337 | Azathioprine               | 5.97E+05 | 2.08E+05 | 2.866727237 |
| 606.0742 | UDP-N-acetyl-D-glucosamine | 4.63E+07 | 1.43E+07 | 3.229520949 |
| 244.0073 | Guanfacine                 | 8.67E+05 | 2.37E+05 | 3.650453862 |
| 308.0988 | N-Acetylneuraminic acid    | 8.56E+05 | 2.15E+05 | 3.979941319 |

781

782
